# Supplementary material for: Synthesis and anticancer mechanisms of four novel platinum(ii) 4′-substituted-2,2′:6′,2′′-terpyridine complexes
Source: Royal Society of Chemistry journal article supplement (doi:10.1039/d3dt03197g), 2023-12-21
Supplement: d3dt03197g1.pdf [file d3dt03197g1.pdf]

## Electronic Supporting Information Materials

### Synthesis and anticancer mechanisms of four novel platinum(II) 4'-substituted-2,2':6',2''-terpyridine complexes

Chun-Jie Liang,<sup>‡a</sup> Run-Chun Wu,<sup>‡a</sup> Xiao-Qiong Huang,<sup>‡a</sup> Qi-Pin Qin,<sup>\*a</sup> Hong Liang<sup>b</sup> and Ming-Xiong Tan<sup>\*a</sup>

**Table S1. Crystal data and structure refinement for PtS.**

|                                             |                                                                                |
|---------------------------------------------|--------------------------------------------------------------------------------|
| Empirical formula                           | C <sub>4</sub> H <sub>12</sub> Cl <sub>2</sub> O <sub>2</sub> PtS <sub>2</sub> |
| Formula weight                              | 422.25                                                                         |
| Temperature/K                               | 150.0                                                                          |
| Crystal system                              | monoclinic                                                                     |
| Space group                                 | P2 <sub>1</sub> /n                                                             |
| a/Å                                         | 8.6224(5)                                                                      |
| b/Å                                         | 13.5614(6)                                                                     |
| c/Å                                         | 9.3946(5)                                                                      |
| α/°                                         | 90                                                                             |
| β/°                                         | 105.6469(19)                                                                   |
| γ/°                                         | 90                                                                             |
| Volume/Å <sup>3</sup>                       | 1057.82(10)                                                                    |
| Z                                           | 4                                                                              |
| ρ <sub>calc</sub> /mg/mm <sup>3</sup>       | 2.651                                                                          |
| m/mm <sup>-1</sup>                          | 14.119                                                                         |
| F(000)                                      | 784.0                                                                          |
| Crystal size/mm <sup>3</sup>                | 0.24 × 0.24 × 0.23                                                             |
| 2θ range for data collection                | 5.414 to 49.994°                                                               |
| Index ranges                                | -10 ≤ h ≤ 10, -16 ≤ k ≤ 16, -11 ≤ l ≤ 11                                       |
| Reflections collected                       | 21981                                                                          |
| Independent reflections                     | 1858[R(int) = 0.0501]                                                          |
| Data/restraints/parameters                  | 1858/0/105                                                                     |
| Goodness-of-fit on F <sup>2</sup>           | 1.003                                                                          |
| Final R indexes [I ≥ 2σ(I)]                 | R <sub>1</sub> = 0.0223, wR <sub>2</sub> = 0.0586                              |
| Final R indexes [all data]                  | R <sub>1</sub> = 0.0236, wR <sub>2</sub> = 0.0593                              |
| Largest diff. peak/hole / e Å <sup>-3</sup> | 1.73/-1.11                                                                     |

**Table S2. Bond Lengths for PtS.**

| Atom | Atom | Length/Å   | Atom | Atom | Length/Å |
|------|------|------------|------|------|----------|
| Pt1  | S2   | 2.2312(12) | S2   | C3   | 1.775(5) |
| Pt1  | Cl1  | 2.3221(13) | S2   | C4   | 1.775(5) |

|     |     |            |    |    |          |
|-----|-----|------------|----|----|----------|
| Pt1 | S1  | 2.2478(13) | S1 | O1 | 1.470(4) |
| Pt1 | Cl2 | 2.3150(15) | S1 | C2 | 1.781(5) |
| S2  | O2  | 1.466(4)   | S1 | C1 | 1.771(5) |

**Table S3. Bond Angles for PtS.**

| Atom | Atom | Atom | Angle/°    | Atom | Atom | Atom | Angle/°    |
|------|------|------|------------|------|------|------|------------|
| S2   | Pt1  | C11  | 176.09(5)  | C3   | S2   | Pt1  | 108.2(2)   |
| S2   | Pt1  | S1   | 91.11(5)   | C3   | S2   | C4   | 102.8(3)   |
| S2   | Pt1  | Cl2  | 88.65(5)   | C4   | S2   | Pt1  | 111.5(2)   |
| S1   | Pt1  | C11  | 92.73(5)   | O1   | S1   | Pt1  | 112.81(16) |
| S1   | Pt1  | Cl2  | 174.95(5)  | O1   | S1   | C2   | 108.0(2)   |
| Cl2  | Pt1  | C11  | 87.46(5)   | O1   | S1   | C1   | 109.8(2)   |
| O2   | S2   | Pt1  | 117.39(16) | C2   | S1   | Pt1  | 113.16(18) |
| O2   | S2   | C3   | 108.0(3)   | C1   | S1   | Pt1  | 112.12(19) |
| O2   | S2   | C4   | 107.9(3)   | C1   | S1   | C2   | 100.2(3)   |

**Table S4. Crystal data and structure refinement for tpy1Pt.**

|                                       |                                                                                                              |
|---------------------------------------|--------------------------------------------------------------------------------------------------------------|
| Empirical formula                     | C <sub>30</sub> H <sub>38</sub> Cl <sub>4</sub> N <sub>6</sub> O <sub>5</sub> Pt <sub>2</sub> S <sub>2</sub> |
| Formula weight                        | 1158.76                                                                                                      |
| Temperature/K                         | 150.0                                                                                                        |
| Crystal system                        | triclinic                                                                                                    |
| Space group                           | P-1                                                                                                          |
| a/Å                                   | 9.7407(6)                                                                                                    |
| b/Å                                   | 11.1975(5)                                                                                                   |
| c/Å                                   | 19.3778(12)                                                                                                  |
| α/°                                   | 77.3037(18)                                                                                                  |
| β/°                                   | 79.196(2)                                                                                                    |
| γ/°                                   | 75.1122(17)                                                                                                  |
| Volume/Å <sup>3</sup>                 | 1973.3(2)                                                                                                    |
| Z                                     | 2                                                                                                            |
| ρ <sub>calc</sub> /mg/mm <sup>3</sup> | 1.950                                                                                                        |
| m/mm <sup>-1</sup>                    | 7.502                                                                                                        |
| F(000)                                | 1112.0                                                                                                       |
| Crystal size/mm <sup>3</sup>          | 0.26 × 0.25 × 0.21                                                                                           |
| 2θ range for data collection          | 4.352 to 50.02°                                                                                              |
| Index ranges                          | -11 ≤ h ≤ 11, -13 ≤ k ≤ 13, -23 ≤ l ≤ 23                                                                     |
| Reflections collected                 | 60448                                                                                                        |
| Independent reflections               | 6956[R(int) = 0.0821]                                                                                        |
| Data/restraints/parameters            | 6956/294/448                                                                                                 |
| Goodness-of-fit on F <sup>2</sup>     | 1.125                                                                                                        |
| Final R indexes [I ≥ 2σ (I)]          | R <sub>1</sub> = 0.0550, wR <sub>2</sub> = 0.1383                                                            |
| Final R indexes [all data]            | R <sub>1</sub> = 0.0638, wR <sub>2</sub> = 0.1446                                                            |

**Table S5. Bond Lengths for tpy1Pt.**

| Atom | Atom | Length/Å  | Atom | Atom | Length/Å  |
|------|------|-----------|------|------|-----------|
| Pt1  | C11  | 2.297(3)  | N6   | C24  | 1.477(14) |
| Pt1  | S1   | 2.213(3)  | N6   | C20  | 1.465(14) |
| Pt1  | C12  | 2.297(3)  | N3   | C5   | 1.316(13) |
| Pt1  | N1   | 2.072(9)  | N3   | C9   | 1.346(13) |
| Pt2  | C13  | 2.305(3)  | C11  | C10  | 1.402(15) |
| Pt2  | C14  | 2.291(3)  | C23  | C22  | 1.563(16) |
| Pt2  | S2   | 2.219(3)  | C23  | C24  | 1.516(17) |
| Pt2  | N4   | 2.097(9)  | C22  | C25  | 1.490(18) |
| S1   | O1   | 1.467(9)  | C1   | C2   | 1.386(15) |
| S1   | C26  | 1.773(13) | C7   | C8   | 1.397(14) |
| S1   | C27  | 1.754(13) | C7   | C6   | 1.400(14) |
| S2   | O2   | 1.464(10) | C7   | C14  | 1.481(14) |
| S2   | C29  | 1.764(15) | C12  | C13  | 1.365(16) |
| S2   | C28  | 1.770(14) | C8   | C9   | 1.392(14) |
| N4   | C11  | 1.340(14) | C17  | C18  | 1.385(14) |
| N4   | C12  | 1.340(14) | C17  | C16  | 1.400(15) |
| N1   | C1   | 1.349(13) | C6   | C5   | 1.396(14) |
| N1   | C4   | 1.344(14) | C15  | C16  | 1.376(15) |
| C21  | C22  | 1.518(17) | C15  | C14  | 1.399(14) |
| C21  | C20  | 1.519(17) | C4   | C3   | 1.379(15) |
| N5   | C13  | 1.344(14) | C18  | C19  | 1.376(15) |
| N5   | C10  | 1.320(13) | C2   | C5   | 1.505(14) |
| N2   | C2   | 1.337(14) | C14  | C19  | 1.389(15) |
| N2   | C3   | 1.327(13) | C9   | C10  | 1.483(14) |
| O3   | C25  | 1.296(17) | C25  | O4   | 1.231(17) |
| N6   | C17  | 1.431(12) | O5   | C30  | 1.38(2)   |

**Table S6. Bond Angles for tpy1Pt.**

| Atom | Atom | Atom | Angle/°    | Atom | Atom | Atom | Angle/°   |
|------|------|------|------------|------|------|------|-----------|
| C11  | Pt1  | C12  | 178.50(10) | C25  | C22  | C21  | 114.8(11) |
| S1   | Pt1  | C11  | 94.19(11)  | C25  | C22  | C23  | 107.9(10) |
| S1   | Pt1  | C12  | 87.09(11)  | N1   | C1   | C2   | 120.1(10) |
| N1   | Pt1  | C11  | 89.0(3)    | C8   | C7   | C6   | 115.6(9)  |
| N1   | Pt1  | S1   | 176.4(3)   | C8   | C7   | C14  | 123.3(9)  |
| N1   | Pt1  | C12  | 89.8(3)    | C6   | C7   | C14  | 121.0(9)  |
| C14  | Pt2  | C13  | 176.94(12) | N4   | C12  | C13  | 121.0(10) |
| S2   | Pt2  | C13  | 85.79(11)  | C9   | C8   | C7   | 120.0(9)  |
| S2   | Pt2  | C14  | 93.31(12)  | C18  | C17  | N6   | 121.0(10) |
| N4   | Pt2  | C13  | 91.7(2)    | C18  | C17  | C16  | 119.3(9)  |

|     |     |     |           |     |     |     |           |
|-----|-----|-----|-----------|-----|-----|-----|-----------|
| N4  | Pt2 | C14 | 89.5(3)   | C16 | C17 | N6  | 119.7(9)  |
| N4  | Pt2 | S2  | 174.5(2)  | C5  | C6  | C7  | 120.3(9)  |
| O1  | S1  | Pt1 | 117.7(4)  | C16 | C15 | C14 | 122.5(10) |
| O1  | S1  | C26 | 107.0(7)  | N1  | C4  | C3  | 119.6(10) |
| O1  | S1  | C27 | 108.4(6)  | C19 | C18 | C17 | 119.5(10) |
| C26 | S1  | Pt1 | 113.8(5)  | N2  | C2  | C1  | 121.9(9)  |
| C27 | S1  | Pt1 | 107.0(4)  | N2  | C2  | C5  | 117.8(9)  |
| C27 | S1  | C26 | 101.7(6)  | C1  | C2  | C5  | 120.1(9)  |
| O2  | S2  | Pt2 | 116.7(4)  | C15 | C16 | C17 | 119.5(9)  |
| O2  | S2  | C29 | 107.1(7)  | N2  | C3  | C4  | 123.2(10) |
| O2  | S2  | C28 | 109.5(7)  | C15 | C14 | C7  | 121.7(9)  |
| C29 | S2  | Pt2 | 114.3(5)  | C19 | C14 | C7  | 122.3(9)  |
| C29 | S2  | C28 | 101.9(7)  | C19 | C14 | C15 | 116.0(9)  |
| C28 | S2  | Pt2 | 106.3(5)  | N3  | C5  | C6  | 123.7(9)  |
| C11 | N4  | Pt2 | 117.7(7)  | N3  | C5  | C2  | 116.5(9)  |
| C11 | N4  | C12 | 116.7(9)  | C6  | C5  | C2  | 119.8(9)  |
| C12 | N4  | Pt2 | 125.3(7)  | N3  | C9  | C8  | 123.6(9)  |
| C1  | N1  | Pt1 | 120.7(7)  | N3  | C9  | C10 | 116.3(9)  |
| C4  | N1  | Pt1 | 121.0(7)  | C8  | C9  | C10 | 120.1(9)  |
| C4  | N1  | C1  | 118.3(9)  | N5  | C13 | C12 | 123.3(10) |
| C22 | C21 | C20 | 111.3(10) | N5  | C10 | C11 | 121.6(10) |
| C10 | N5  | C13 | 116.0(9)  | N5  | C10 | C9  | 120.2(9)  |
| C3  | N2  | C2  | 116.7(9)  | C11 | C10 | C9  | 118.2(9)  |
| C17 | N6  | C24 | 118.4(8)  | C18 | C19 | C14 | 123.2(10) |
| C17 | N6  | C20 | 120.2(8)  | N6  | C24 | C23 | 110.3(9)  |
| C20 | N6  | C24 | 109.4(8)  | N6  | C20 | C21 | 110.7(9)  |
| C5  | N3  | C9  | 116.8(9)  | O3  | C25 | C22 | 115.6(12) |
| N4  | C11 | C10 | 121.4(10) | O4  | C25 | O3  | 122.3(14) |
| C24 | C23 | C22 | 111.2(10) | O4  | C25 | C22 | 121.6(13) |
| C21 | C22 | C23 | 110.2(10) |     |     |     |           |

**Table S7. Crystal data and structure refinement for tpy2Pt.**

|                       |                                                                                                 |
|-----------------------|-------------------------------------------------------------------------------------------------|
| Empirical formula     | C <sub>24</sub> H <sub>25</sub> Cl <sub>4</sub> N <sub>5</sub> O <sub>2</sub> Pt <sub>2</sub> S |
| Formula weight        | 979.53                                                                                          |
| Temperature/K         | 150.0                                                                                           |
| Crystal system        | triclinic                                                                                       |
| Space group           | P-1                                                                                             |
| a/Å                   | 11.4487(5)                                                                                      |
| b/Å                   | 11.5208(6)                                                                                      |
| c/Å                   | 12.9041(7)                                                                                      |
| α/°                   | 105.599(2)                                                                                      |
| β/°                   | 108.6990(10)                                                                                    |
| γ/°                   | 108.5620(10)                                                                                    |
| Volume/Å <sup>3</sup> | 1391.80(12)                                                                                     |

|                                             |                                                   |
|---------------------------------------------|---------------------------------------------------|
| Z                                           | 2                                                 |
| $\rho_{\text{calc}}$ /mg/mm <sup>3</sup>    | 2.337                                             |
| m/mm <sup>-1</sup>                          | 10.533                                            |
| F(000)                                      | 920.0                                             |
| Crystal size/mm <sup>3</sup>                | 0.23 × 0.22 × 0.20                                |
| 2 $\Theta$ range for data collection        | 4.096 to 50.198°                                  |
| Index ranges                                | -13 ≤ h ≤ 13, -13 ≤ k ≤ 13, -15 ≤ l ≤ 15          |
| Reflections collected                       | 37606                                             |
| Independent reflections                     | 4968[R(int) = 0.0534]                             |
| Data/restraints/parameters                  | 4968/0/347                                        |
| Goodness-of-fit on F <sup>2</sup>           | 1.008                                             |
| Final R indexes [I ≥ 2 $\sigma$ (I)]        | R <sub>1</sub> = 0.0269, wR <sub>2</sub> = 0.0625 |
| Final R indexes [all data]                  | R <sub>1</sub> = 0.0400, wR <sub>2</sub> = 0.0676 |
| Largest diff. peak/hole / e Å <sup>-3</sup> | 1.23/-0.68                                        |

**Table S8. Bond Lengths for tpy2Pt.**

| Atom | Atom | Length/Å   | Atom | Atom | Length/Å  |
|------|------|------------|------|------|-----------|
| Pt1  | C11  | 2.3014(15) | C10  | C16  | 1.471(8)  |
| Pt1  | N2   | 1.944(5)   | C10  | C11  | 1.370(8)  |
| Pt1  | N1   | 2.007(5)   | N4   | C14  | 1.319(8)  |
| Pt1  | N3   | 2.015(5)   | N4   | C13  | 1.321(8)  |
| Pt3  | S1   | 2.2055(17) | C19  | C18  | 1.373(10) |
| Pt3  | C14  | 2.3065(17) | C16  | C17  | 1.386(9)  |
| Pt3  | C13  | 2.3200(17) | C8   | C7   | 1.409(9)  |
| Pt3  | C12  | 2.3013(17) | C6   | C5   | 1.403(9)  |
| S1   | O1   | 1.457(5)   | C6   | C1   | 1.403(9)  |
| S1   | C21  | 1.770(7)   | C6   | C7   | 1.478(8)  |
| S1   | C20  | 1.757(8)   | C2   | C3   | 1.391(10) |
| N2   | C9   | 1.339(8)   | C2   | C1   | 1.372(9)  |
| N2   | C10  | 1.355(8)   | C23  | C24  | 1.494(10) |
| N1   | C12  | 1.375(8)   | C23  | C22  | 1.482(10) |
| N1   | C15  | 1.350(8)   | C17  | N5   | 1.325(8)  |
| O2   | C23  | 1.202(8)   | C5   | C4   | 1.368(9)  |
| N3   | C19  | 1.350(8)   | C3   | C4   | 1.364(10) |
| N3   | C16  | 1.364(8)   | C14  | C15  | 1.371(9)  |
| C12  | C9   | 1.475(8)   | C18  | N5   | 1.338(9)  |
| C12  | C13  | 1.373(9)   | C11  | C7   | 1.399(9)  |
| C9   | C8   | 1.378(8)   |      |      |           |

**Table S9. Bond Angles for tpy2Pt.**

| Atom | Atom | Atom | Angle/°    | Atom | Atom | Atom | Angle/°  |
|------|------|------|------------|------|------|------|----------|
| N2   | Pt1  | C11  | 177.96(15) | C8   | C9   | C12  | 127.8(6) |
| N2   | Pt1  | N1   | 81.0(2)    | N2   | C10  | C16  | 111.9(5) |

|     |     |     |            |     |     |     |          |
|-----|-----|-----|------------|-----|-----|-----|----------|
| N2  | Pt1 | N3  | 80.7(2)    | N2  | C10 | C11 | 118.2(6) |
| N1  | Pt1 | C11 | 98.27(15)  | C11 | C10 | C16 | 129.9(6) |
| N1  | Pt1 | N3  | 161.6(2)   | C14 | N4  | C13 | 117.0(6) |
| N3  | Pt1 | C11 | 100.03(15) | N3  | C19 | C18 | 119.5(6) |
| S1  | Pt3 | C14 | 87.72(6)   | N3  | C16 | C10 | 115.5(5) |
| S1  | Pt3 | C13 | 176.71(6)  | N3  | C16 | C17 | 119.3(6) |
| S1  | Pt3 | C12 | 93.92(7)   | C17 | C16 | C10 | 125.2(6) |
| C14 | Pt3 | C13 | 89.02(6)   | C9  | C8  | C7  | 119.8(6) |
| C12 | Pt3 | C14 | 177.97(6)  | C5  | C6  | C1  | 117.1(6) |
| C12 | Pt3 | C13 | 89.35(6)   | C5  | C6  | C7  | 121.4(6) |
| O1  | S1  | Pt3 | 116.4(2)   | C1  | C6  | C7  | 121.5(6) |
| O1  | S1  | C21 | 109.2(3)   | C1  | C2  | C3  | 120.0(7) |
| O1  | S1  | C20 | 107.1(4)   | O2  | C23 | C24 | 120.6(7) |
| C21 | S1  | Pt3 | 108.3(3)   | O2  | C23 | C22 | 121.8(7) |
| C20 | S1  | Pt3 | 114.7(3)   | C22 | C23 | C24 | 117.7(7) |
| C20 | S1  | C21 | 99.7(4)    | N5  | C17 | C16 | 122.8(6) |
| C9  | N2  | Pt1 | 118.2(4)   | C4  | C5  | C6  | 120.6(7) |
| C9  | N2  | C10 | 123.4(5)   | C4  | C3  | C2  | 119.0(6) |
| C10 | N2  | Pt1 | 118.4(4)   | N4  | C14 | C15 | 123.5(6) |
| C12 | N1  | Pt1 | 113.3(4)   | C2  | C1  | C6  | 121.5(6) |
| C15 | N1  | Pt1 | 129.4(4)   | N5  | C18 | C19 | 123.3(7) |
| C15 | N1  | C12 | 117.2(5)   | C17 | N5  | C18 | 116.6(6) |
| C19 | N3  | Pt1 | 128.0(4)   | C10 | C11 | C7  | 121.4(6) |
| C19 | N3  | C16 | 118.5(5)   | C8  | C7  | C6  | 121.4(6) |
| C16 | N3  | Pt1 | 113.6(4)   | C11 | C7  | C8  | 117.5(6) |
| N1  | C12 | C9  | 114.7(5)   | C11 | C7  | C6  | 121.1(6) |
| C13 | C12 | N1  | 119.8(6)   | N4  | C13 | C12 | 122.5(6) |
| C13 | C12 | C9  | 125.4(6)   | N1  | C15 | C14 | 119.7(6) |
| N2  | C9  | C12 | 112.6(5)   | C3  | C4  | C5  | 121.8(7) |
| N2  | C9  | C8  | 119.6(6)   |     |     |     |          |

**Table S10. Crystal data and structure refinement for tpy3Pt.**

|                       |                                                                                                   |
|-----------------------|---------------------------------------------------------------------------------------------------|
| Empirical formula     | C <sub>23</sub> H <sub>19</sub> Br <sub>2</sub> Cl <sub>4</sub> N <sub>3</sub> OPt <sub>2</sub> S |
| Formula weight        | 1077.27                                                                                           |
| Temperature/K         | 150.0                                                                                             |
| Crystal system        | triclinic                                                                                         |
| Space group           | P-1                                                                                               |
| a/Å                   | 7.5483(7)                                                                                         |
| b/Å                   | 12.8386(10)                                                                                       |
| c/Å                   | 14.7671(13)                                                                                       |
| α/°                   | 79.304(3)                                                                                         |
| β/°                   | 75.497(3)                                                                                         |
| γ/°                   | 83.119(3)                                                                                         |
| Volume/Å <sup>3</sup> | 1357.3(2)                                                                                         |

|                                                |                                                            |
|------------------------------------------------|------------------------------------------------------------|
| Z                                              | 2                                                          |
| $\rho_{\text{calc}}/\text{mg}/\text{mm}^3$     | 2.636                                                      |
| $\text{m}/\text{mm}^{-1}$                      | 13.734                                                     |
| F(000)                                         | 992.0                                                      |
| Crystal size/ $\text{mm}^3$                    | $0.20 \times 0.18 \times 0.17$                             |
| $2\Theta$ range for data collection            | 4.674 to 50.018°                                           |
| Index ranges                                   | $-8 \leq h \leq 8, -15 \leq k \leq 15, -17 \leq l \leq 17$ |
| Reflections collected                          | 29274                                                      |
| Independent reflections                        | 4768[R(int) = 0.0639]                                      |
| Data/restraints/parameters                     | 4768/0/292                                                 |
| Goodness-of-fit on $F^2$                       | 1.217                                                      |
| Final R indexes [ $I \geq 2\sigma(I)$ ]        | $R_1 = 0.0903, wR_2 = 0.2135$                              |
| Final R indexes [all data]                     | $R_1 = 0.0988, wR_2 = 0.2202$                              |
| Largest diff. peak/hole / $e \text{ \AA}^{-3}$ | 2.91/-5.17                                                 |

**Table S11. Bond Lengths for tpy3Pt.**

| Atom | Atom | Length/Å  | Atom | Atom | Length/Å  |
|------|------|-----------|------|------|-----------|
| Pt2  | S1   | 2.198(5)  | C7   | C11  | 1.3900    |
| Pt2  | C13  | 2.325(5)  | C7   | C6   | 1.512(12) |
| Pt2  | C14  | 2.319(5)  | C11  | C10  | 1.3900    |
| Pt2  | C12  | 2.296(5)  | C10  | C17  | 1.49(2)   |
| Pt1  | C11  | 2.294(6)  | N2   | C16  | 1.3900    |
| Pt1  | N3   | 2.034(19) | N2   | C12  | 1.3900    |
| Pt1  | N1   | 1.866(8)  | C16  | C15  | 1.3900    |
| Pt1  | N2   | 1.995(9)  | C15  | C14  | 1.3900    |
| Br1  | C2   | 1.887(10) | C14  | C13  | 1.3900    |
| Br2  | C4   | 1.852(10) | C13  | C12  | 1.3900    |
| S1   | O1   | 1.452(17) | C21  | C20  | 1.36(3)   |
| S1   | C22  | 1.74(3)   | C17  | C18  | 1.34(3)   |
| S1   | C23  | 1.77(2)   | C1   | C6   | 1.3900    |
| N3   | C21  | 1.32(3)   | C1   | C2   | 1.3900    |
| N3   | C17  | 1.36(3)   | C6   | C5   | 1.3900    |
| N1   | C9   | 1.3900    | C5   | C4   | 1.3900    |
| N1   | C10  | 1.3900    | C4   | C3   | 1.3900    |
| C9   | C8   | 1.3900    | C3   | C2   | 1.3900    |
| C9   | C12  | 1.434(12) | C18  | C19  | 1.37(3)   |
| C8   | C7   | 1.3900    | C19  | C20  | 1.43(3)   |

**Table S12. Bond Angles for tpy3Pt.**

| Atom | Atom | Atom | Angle/°  | Atom | Atom | Atom | Angle/°   |
|------|------|------|----------|------|------|------|-----------|
| S1   | Pt2  | C13  | 176.7(2) | N1   | C10  | C17  | 109.5(11) |
| S1   | Pt2  | C14  | 86.7(2)  | C11  | C10  | N1   | 120.0     |

|     |     |     |           |     |     |     |           |
|-----|-----|-----|-----------|-----|-----|-----|-----------|
| S1  | Pt2 | C12 | 93.1(2)   | C11 | C10 | C17 | 130.5(11) |
| C14 | Pt2 | C13 | 90.74(19) | C16 | N2  | Pt1 | 126.5(7)  |
| C12 | Pt2 | C13 | 89.5(2)   | C16 | N2  | C12 | 120.0     |
| C12 | Pt2 | C14 | 178.0(2)  | C12 | N2  | Pt1 | 113.4(7)  |
| N3  | Pt1 | C11 | 98.4(6)   | C15 | C16 | N2  | 120.0     |
| N1  | Pt1 | C11 | 179.0(4)  | C16 | C15 | C14 | 120.0     |
| N1  | Pt1 | N3  | 80.7(6)   | C13 | C14 | C15 | 120.0     |
| N1  | Pt1 | N2  | 81.6(5)   | C14 | C13 | C12 | 120.0     |
| N2  | Pt1 | C11 | 99.4(4)   | N2  | C12 | C9  | 113.8(9)  |
| N2  | Pt1 | N3  | 162.2(6)  | C13 | C12 | C9  | 126.2(9)  |
| O1  | S1  | Pt2 | 115.7(7)  | C13 | C12 | N2  | 120.0     |
| O1  | S1  | C22 | 106.9(12) | N3  | C21 | C20 | 124(2)    |
| O1  | S1  | C23 | 107.3(12) | N3  | C17 | C10 | 115.0(17) |
| C22 | S1  | Pt2 | 113.7(9)  | C18 | C17 | N3  | 122(2)    |
| C22 | S1  | C23 | 102.1(13) | C18 | C17 | C10 | 122.7(18) |
| C23 | S1  | Pt2 | 110.1(9)  | C6  | C1  | C2  | 120.0     |
| C21 | N3  | Pt1 | 128.6(16) | C1  | C6  | C7  | 119.8(10) |
| C21 | N3  | C17 | 117.8(19) | C5  | C6  | C7  | 120.1(10) |
| C17 | N3  | Pt1 | 113.5(14) | C5  | C6  | C1  | 120.0     |
| C9  | N1  | Pt1 | 118.7(6)  | C6  | C5  | C4  | 120.0     |
| C9  | N1  | C10 | 120.0     | C5  | C4  | Br2 | 122.1(8)  |
| C10 | N1  | Pt1 | 121.3(6)  | C3  | C4  | Br2 | 117.9(8)  |
| N1  | C9  | C8  | 120.0     | C3  | C4  | C5  | 120.0     |
| N1  | C9  | C12 | 112.4(9)  | C4  | C3  | C2  | 120.0     |
| C8  | C9  | C12 | 127.6(9)  | C1  | C2  | Br1 | 122.0(8)  |
| C7  | C8  | C9  | 120.0     | C3  | C2  | Br1 | 117.9(8)  |
| C8  | C7  | C6  | 120.6(9)  | C3  | C2  | C1  | 120.0     |
| C11 | C7  | C8  | 120.0     | C17 | C18 | C19 | 121(2)    |
| C11 | C7  | C6  | 119.4(9)  | C18 | C19 | C20 | 117(2)    |
| C7  | C11 | C10 | 120.0     | C21 | C20 | C19 | 118(2)    |

**Table S13. Crystal data and structure refinement for tpy4Pt.**

|                   |                                                                                  |
|-------------------|----------------------------------------------------------------------------------|
| Empirical formula | C <sub>16</sub> H <sub>15</sub> Cl <sub>2</sub> N <sub>3</sub> O <sub>2</sub> Pt |
| Formula weight    | 547.30                                                                           |
| Temperature/K     | 150.0                                                                            |
| Crystal system    | triclinic                                                                        |
| Space group       | P-1                                                                              |
| a/Å               | 7.4848(7)                                                                        |
| b/Å               | 8.8709(8)                                                                        |
| c/Å               | 13.4498(12)                                                                      |
| α/°               | 73.384(3)                                                                        |
| β/°               | 76.458(3)                                                                        |



|                                               |                                                            |
|-----------------------------------------------|------------------------------------------------------------|
| $\gamma/^\circ$                               | 73.499(3)                                                  |
| Volume/ $\text{\AA}^3$                        | 809.05(13)                                                 |
| Z                                             | 2                                                          |
| $\rho_{\text{calc}}/\text{mg}/\text{mm}^3$    | 2.247                                                      |
| $\text{m}/\text{mm}^{-1}$                     | 9.016                                                      |
| F(000)                                        | 520.0                                                      |
| Crystal size/ $\text{mm}^3$                   | $0.35 \times 0.33 \times 0.31$                             |
| $2\Theta$ range for data collection           | 4.928 to 50.018 $^\circ$                                   |
| Index ranges                                  | $-8 \leq h \leq 8, -10 \leq k \leq 10, -16 \leq l \leq 16$ |
| Reflections collected                         | 17161                                                      |
| Independent reflections                       | 2847[R(int) = 0.0829]                                      |
| Data/restraints/parameters                    | 2847/0/219                                                 |
| Goodness-of-fit on $F^2$                      | 1.000                                                      |
| Final R indexes [ $I \geq 2\sigma(I)$ ]       | $R_1 = 0.0542, wR_2 = 0.1377$                              |
| Final R indexes [all data]                    | $R_1 = 0.0608, wR_2 = 0.1425$                              |
| Largest diff. peak/hole / $e \text{\AA}^{-3}$ | 3.40/-3.26                                                 |

**Table S14. Bond Lengths for tpy4Pt.**

| Atom | Atom | Length/ $\text{\AA}$ | Atom | Atom | Length/ $\text{\AA}$ |
|------|------|----------------------|------|------|----------------------|
| Pt1  | C11  | 2.303(3)             | C6   | C7   | 1.391(16)            |
| Pt1  | N2   | 1.903(10)            | C10  | C9   | 1.400(17)            |
| Pt1  | N1   | 2.051(11)            | C10  | C11  | 1.468(19)            |
| Pt1  | N3   | 2.034(11)            | C5   | C4   | 1.379(18)            |
| N2   | C6   | 1.356(18)            | C15  | C14  | 1.379(19)            |
| N2   | C10  | 1.349(17)            | C1   | C2   | 1.36(2)              |
| O1   | C8   | 1.354(15)            | C2   | C3   | 1.36(2)              |
| O2   | C16  | 1.49(2)              | C8   | C7   | 1.377(18)            |
| N1   | C5   | 1.374(16)            | C8   | C9   | 1.409(17)            |
| N1   | C1   | 1.296(17)            | C12  | C11  | 1.362(18)            |
| N3   | C15  | 1.349(16)            | C12  | C13  | 1.373(19)            |
| N3   | C11  | 1.352(17)            | C4   | C3   | 1.382(19)            |
| C6   | C5   | 1.436(18)            | C14  | C13  | 1.41(2)              |

**Table S15. Bond Angles for tpy4Pt.**

| Atom | Atom | Atom | Angle/ $^\circ$ | Atom | Atom | Atom | Angle/ $^\circ$ |
|------|------|------|-----------------|------|------|------|-----------------|
| N2   | Pt1  | C11  | 179.3(4)        | C9   | C10  | C11  | 126.9(12)       |
| N2   | Pt1  | N1   | 81.4(5)         | N1   | C5   | C6   | 116.8(11)       |
| N2   | Pt1  | N3   | 80.8(5)         | N1   | C5   | C4   | 117.8(11)       |
| N1   | Pt1  | C11  | 97.9(3)         | C4   | C5   | C6   | 125.4(12)       |
| N3   | Pt1  | C11  | 99.9(3)         | N3   | C15  | C14  | 118.8(13)       |

|     |     |     |           |     |     |     |           |
|-----|-----|-----|-----------|-----|-----|-----|-----------|
| N3  | Pt1 | N1  | 162.1(4)  | N1  | C1  | C2  | 120.9(13) |
| C6  | N2  | Pt1 | 118.5(9)  | C3  | C2  | C1  | 120.0(13) |
| C10 | N2  | Pt1 | 118.7(9)  | O1  | C8  | C7  | 116.9(10) |
| C10 | N2  | C6  | 122.9(11) | O1  | C8  | C9  | 122.0(12) |
| C5  | N1  | Pt1 | 110.5(9)  | C7  | C8  | C9  | 121.0(11) |
| C1  | N1  | Pt1 | 127.3(9)  | C8  | C7  | C6  | 119.4(12) |
| C1  | N1  | C5  | 122.3(12) | C11 | C12 | C13 | 119.9(13) |
| C15 | N3  | Pt1 | 125.2(10) | C5  | C4  | C3  | 120.0(12) |
| C15 | N3  | C11 | 121.6(12) | C10 | C9  | C8  | 117.4(12) |
| C11 | N3  | Pt1 | 113.2(8)  | N3  | C11 | C10 | 114.4(11) |
| N2  | C6  | C5  | 112.8(10) | N3  | C11 | C12 | 121.0(12) |
| N2  | C6  | C7  | 119.1(12) | C12 | C11 | C10 | 124.6(12) |
| C7  | C6  | C5  | 128.2(12) | C15 | C14 | C13 | 120.3(13) |
| N2  | C10 | C9  | 120.1(12) | C12 | C13 | C14 | 118.4(12) |
| N2  | C10 | C11 | 112.9(11) | C2  | C3  | C4  | 119.0(13) |

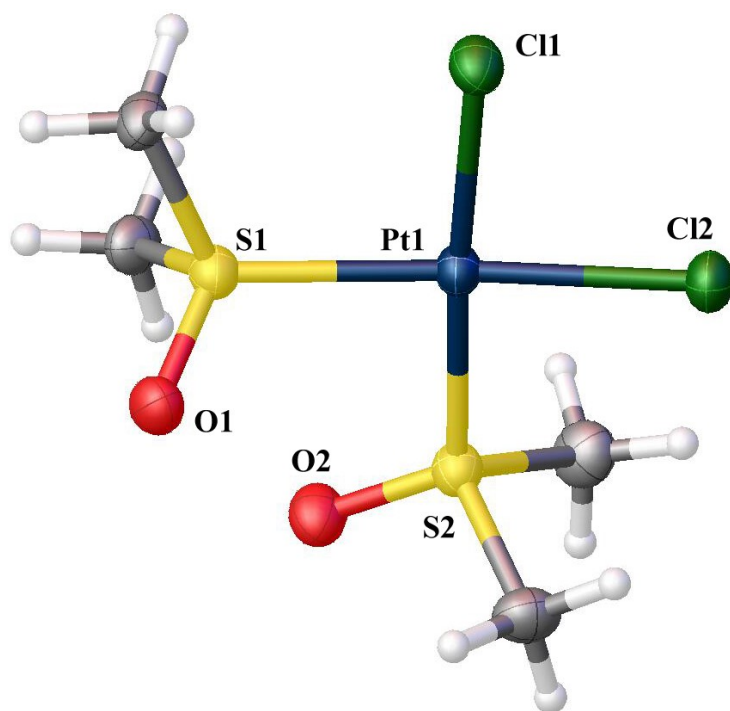

**Figure S1.** ORTEP view of PtS.

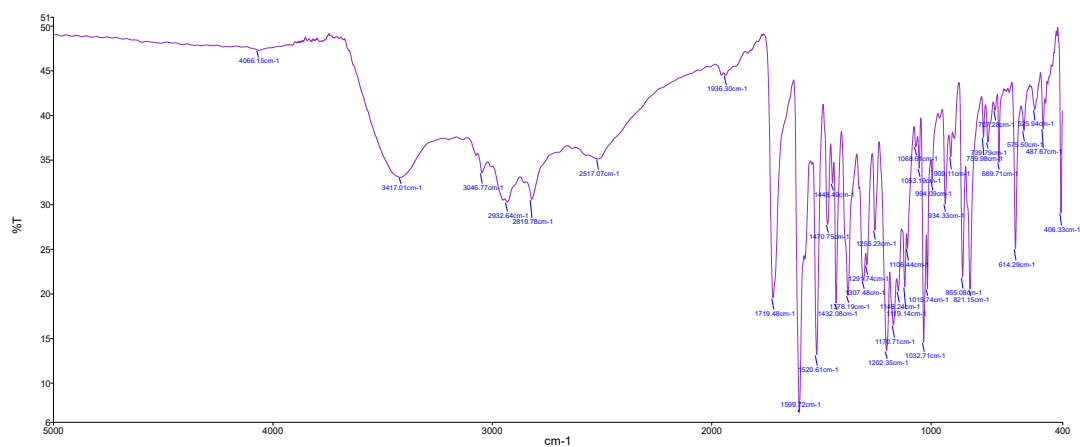

Figure S2. IR (KBr) spectra of tpy1.

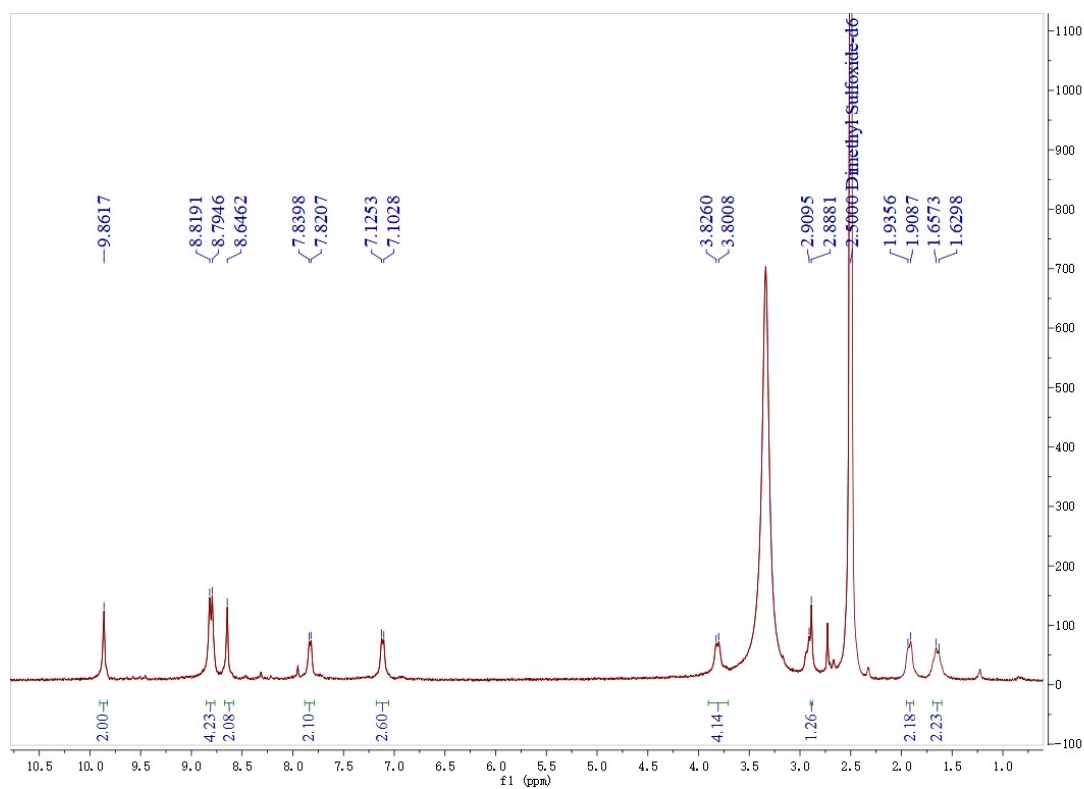

Figure S3. <sup>1</sup>H NMR (400MHz, DMSO-d<sub>6</sub>) for complex tpy1.

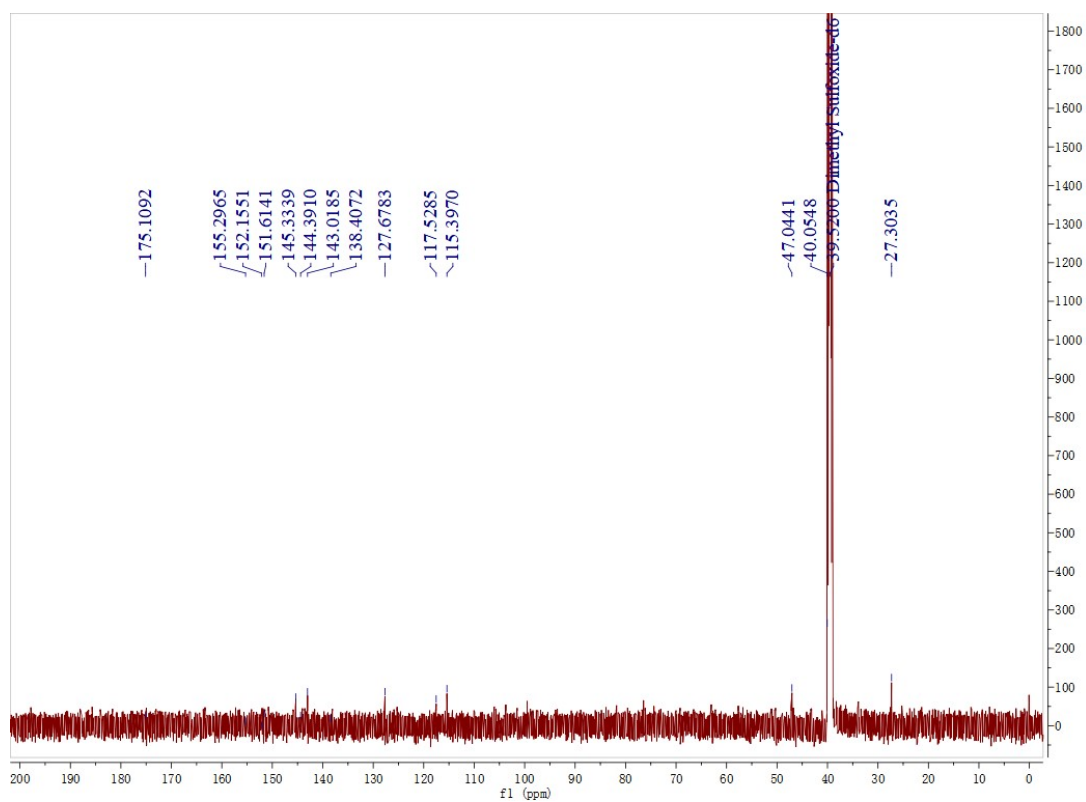

Figure S4.  $^{13}\text{C}$  NMR (101MHz, DMSO- $d_6$ ) for complex tpy1.

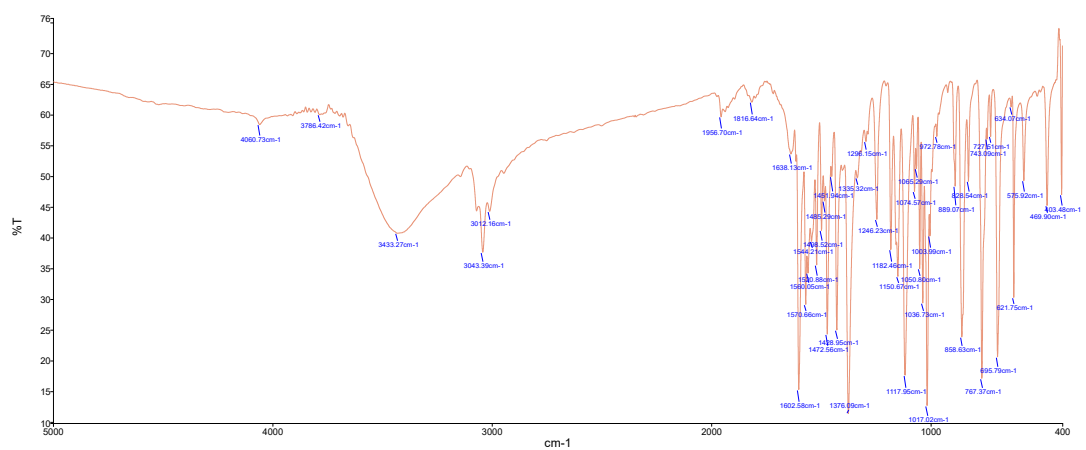

Figure S5. IR (KBr) spectra of tpy2.

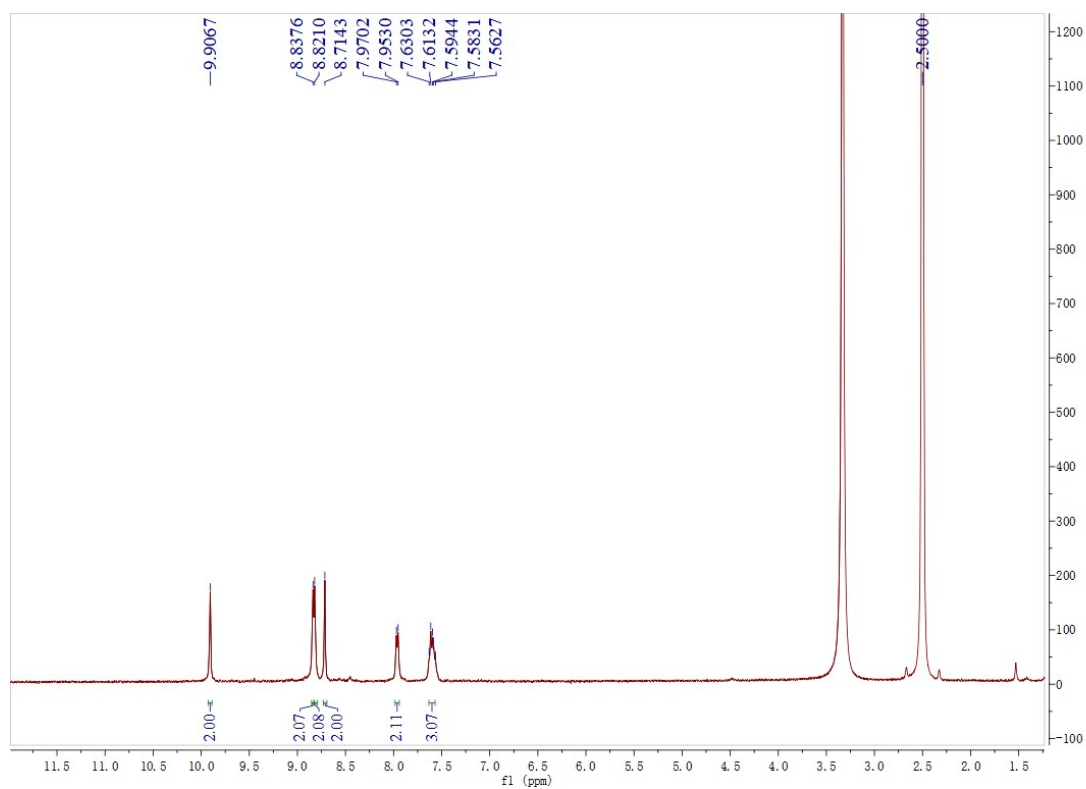

**Figure S6.**  $^1\text{H}$  NMR (400MHz, DMSO- $d_6$ ) for complex tpy2.

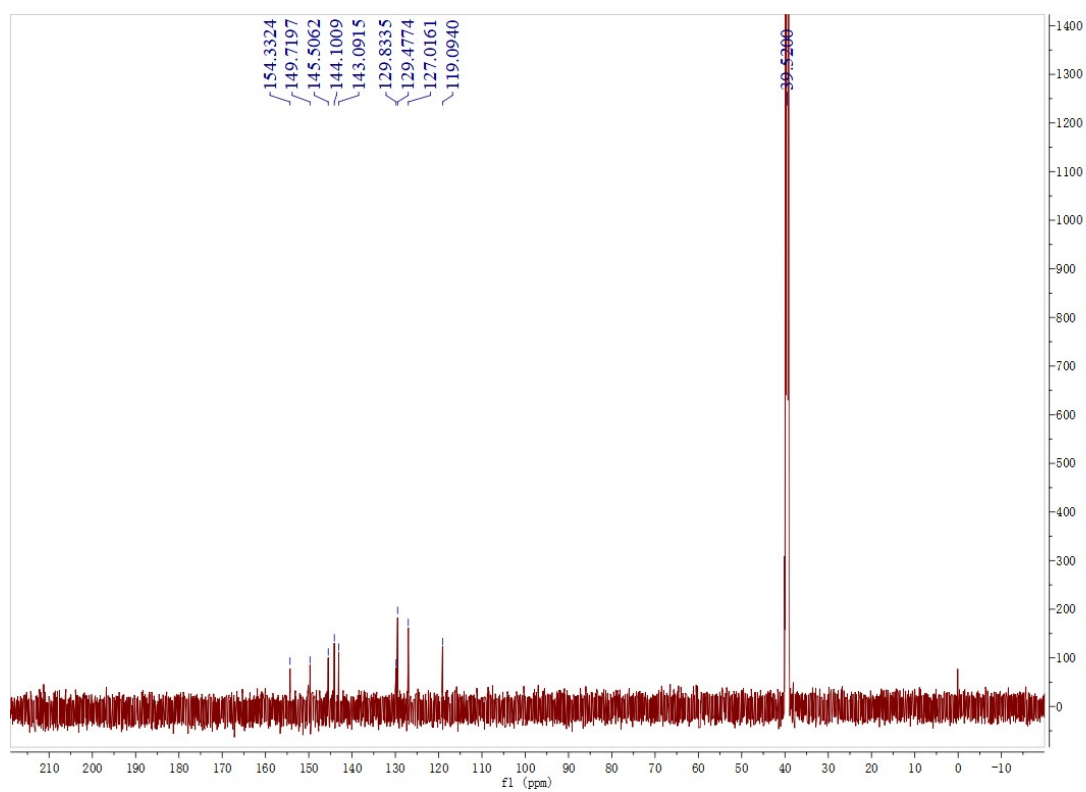

**Figure S7.**  $^{13}\text{C}$  NMR (101MHz, DMSO- $d_6$ ) for complex tpy2.

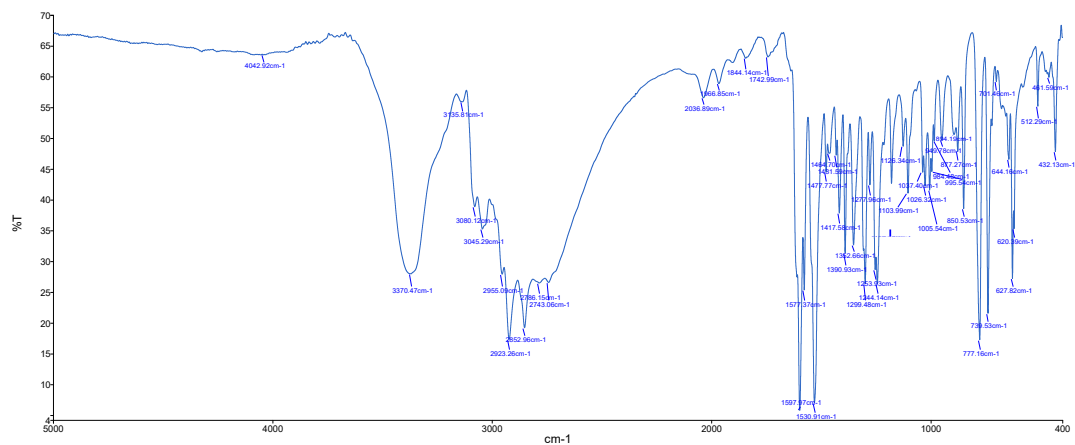

Figure S8. IR (KBr) spectra of tpy3.

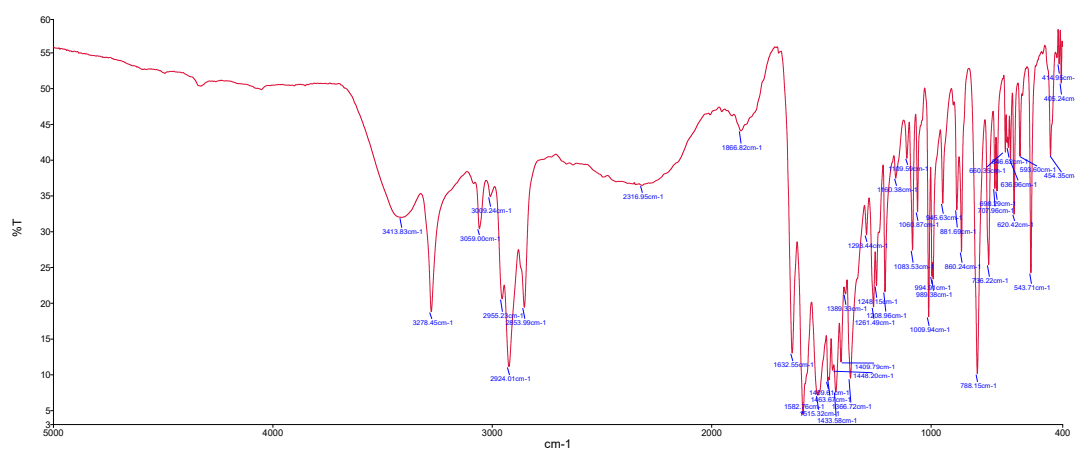

Figure S9. IR (KBr) spectra of tpy4.

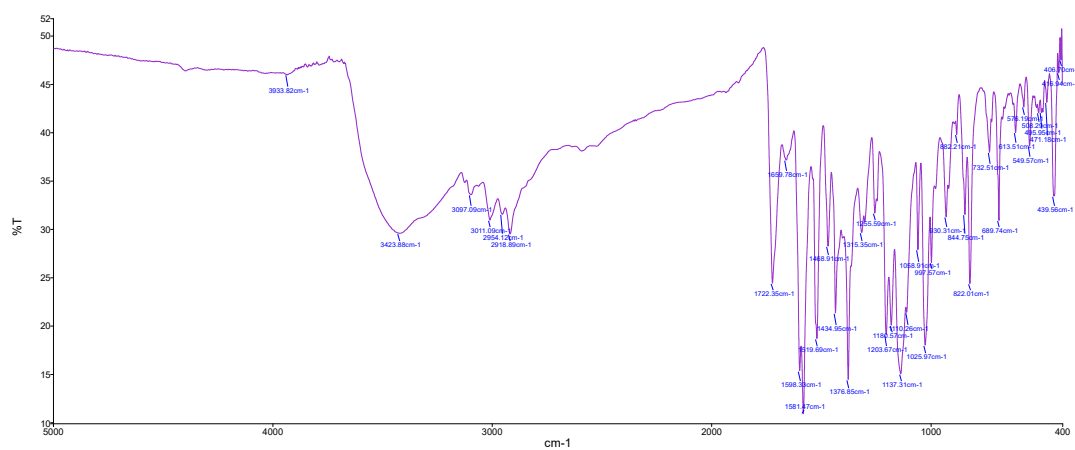

Figure S10. IR (KBr) spectra of tpy1Pt.

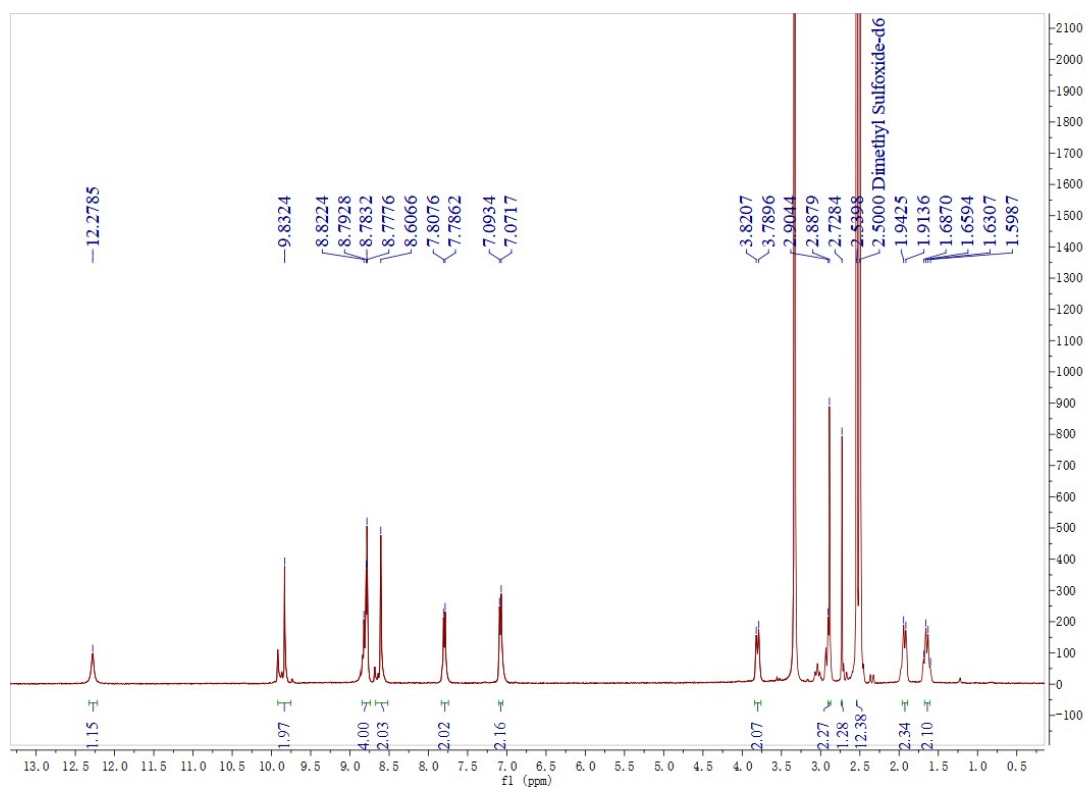

Figure S11.  $^1\text{H}$  NMR (500MHz, DMSO- $d_6$ ) for complex tpy1Pt.

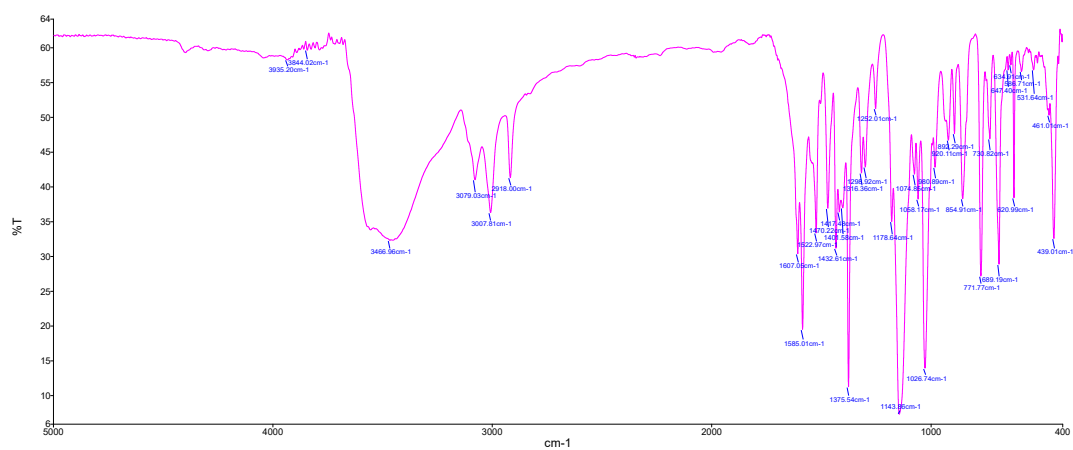

Figure S12. IR (KBr) spectra of tpy2Pt.

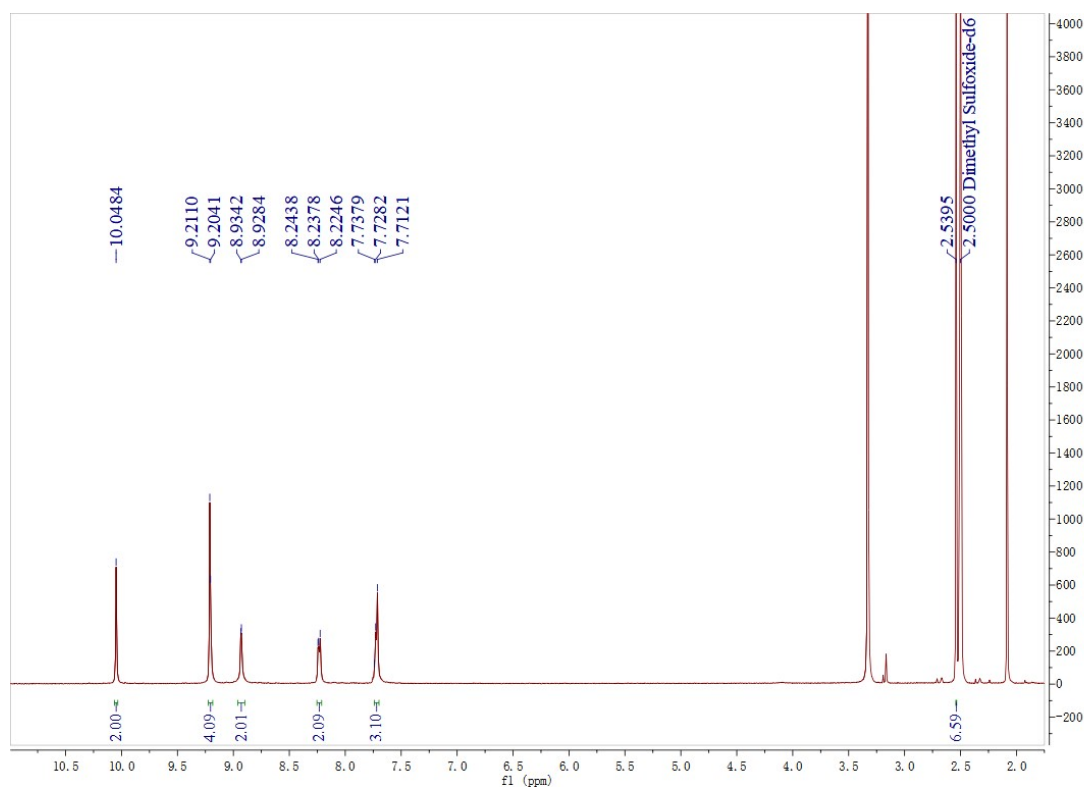

Figure S13.  $^1\text{H}$  NMR (500MHz, DMSO- $d_6$ ) for complex **tpy2Pt**.

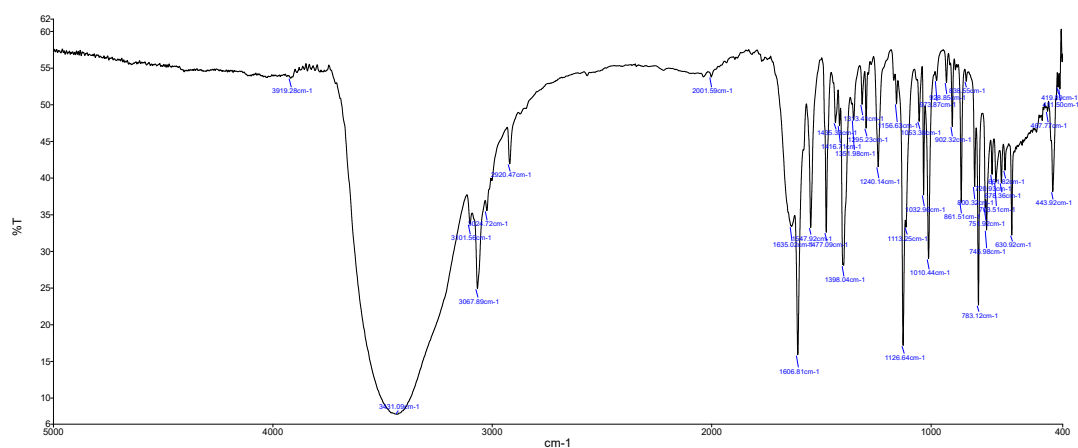

Figure S14. IR (KBr) spectra of **tpy3Pt**.

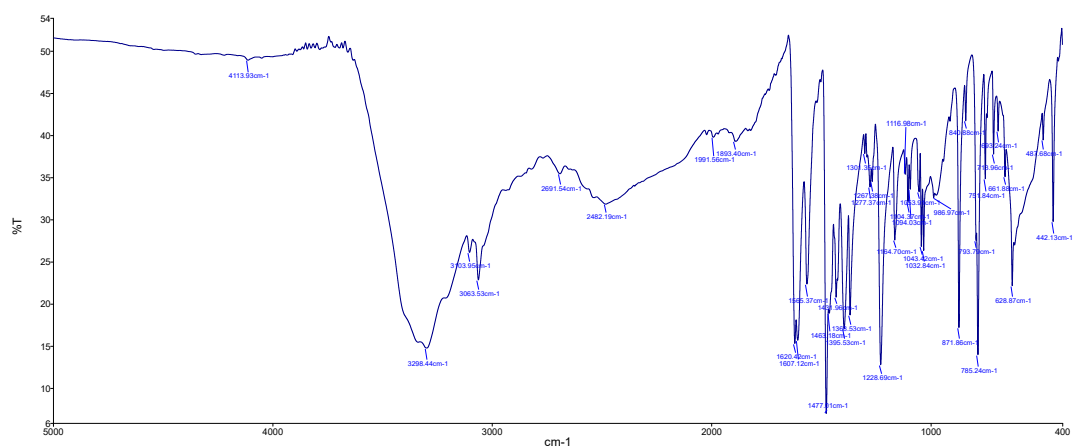

Figure S15. IR (KBr) spectra of **tpy4Pt**.



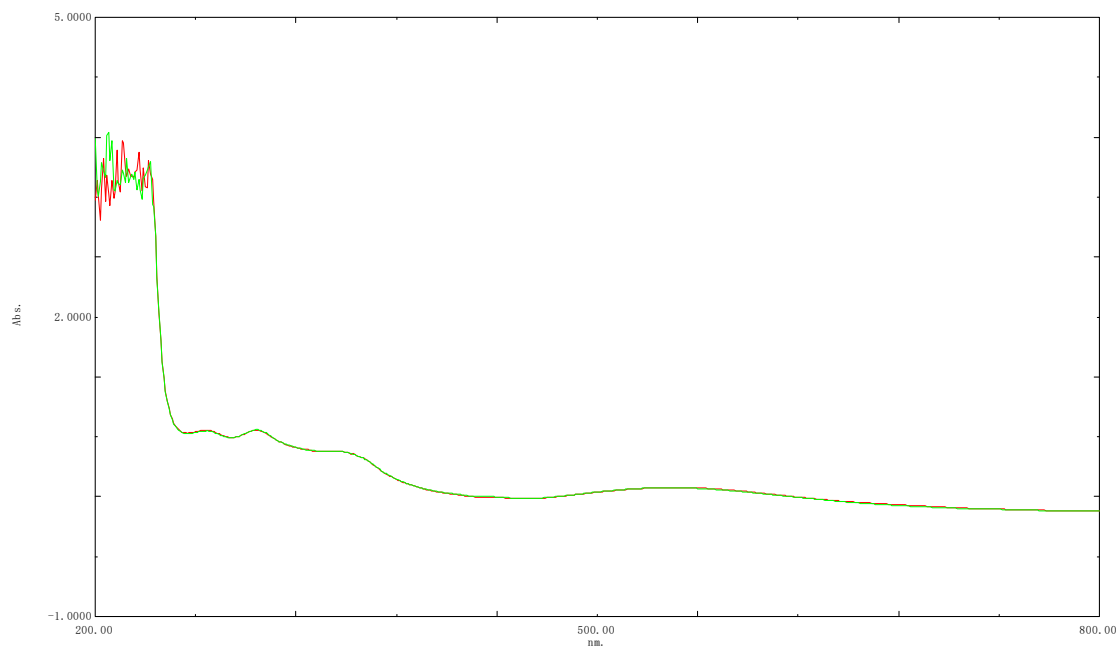

**Figure S16.** UV-Vis absorption spectra of **tpy1Pt** ( $5.0 \times 10^{-5}$  M) in Tris-HCl solution in the time course 0 h and 48 h, respectively.

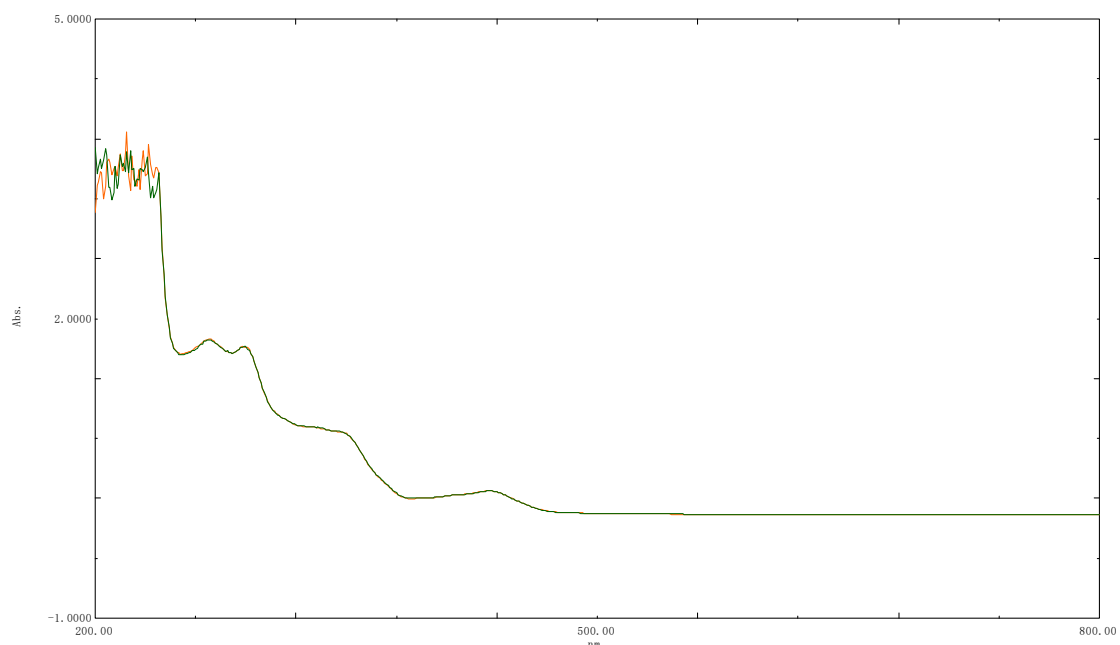

**Figure S17.** UV-Vis absorption spectra of **tpy2Pt** ( $5.0 \times 10^{-5}$  M) in Tris-HCl solution in the time course 0 h and 48 h, respectively.

**Table S16.** The tumor volume (cm<sup>3</sup>) in **tpy1Pt** treated and non-treated mice from the date of surgery to the study end point in the SK-OV-3 xenograft model (mean±SD, n=6).

|               | 1day        | 3day         | 5day        | 7day        | 9day        | 11day       | 13day       | 15day       | 17day       | 19day       | 21day       |
|---------------|-------------|--------------|-------------|-------------|-------------|-------------|-------------|-------------|-------------|-------------|-------------|
| control       | 0.102±0.006 | 0.142±0.014  | 0.217±0.034 | 0.364±0.049 | 0.531±0.055 | 0.698±0.041 | 0.818±0.038 | 0.95±0.039  | 1.074±0.049 | 1.188±0.046 | 1.404±0.091 |
| <b>tpy1Pt</b> | 0.097±0.01  | 0.1393±0.014 | 0.205±0.014 | 0.311±0.043 | 0.392±0.052 | 0.432±0.049 | 0.472±0.051 | 0.497±0.057 | 0.518±0.039 | 0.569±0.047 | 0.658±0.036 |

\*  $p < 0.05$ ,  $p$  vs vehicle control.

**Table S17.** Average body weight (g) in **tpy1Pt** treated and non-treated mice from the date of surgery to the study end point in the SK-OV-3 xenograft model (mean±SD, n=6).

|               | 1day     | 3day     | 5day     | 7day     | 9day     | 11day    | 13day    | 15day    | 17day    | 19day    | 21day    |
|---------------|----------|----------|----------|----------|----------|----------|----------|----------|----------|----------|----------|
| control       | 18.8±0.4 | 18.9±0.3 | 19.3±0.3 | 19.6±0.4 | 19.9±0.4 | 20.2±0.4 | 20.6±0.4 | 20.7±0.2 | 20.9±0.3 | 21.1±0.3 | 21.4±0.3 |
| <b>tpy1Pt</b> | 18.4±0.6 | 18.6±0.6 | 18.8±0.6 | 19.1±0.6 | 19.3±0.6 | 19.6±0.6 | 19.8±0.6 | 19.9±0.6 | 20.1±0.6 | 20.3±0.6 | 20.4±0.7 |

\*  $p < 0.05$ ,  $p$  vs vehicle control.

**Table S18.** In vivo anti-cancer activity of **tpy1Pt** 5.0 mg/kg toward SK-OV-3 tumor xenograft (mean±SD, n=6).

|               | mg/kg | average tumor weight (mean ± SD, g) | inhibition of tumor growth (%) |
|---------------|-------|-------------------------------------|--------------------------------|
| control       | -     | 1.84±0.13                           | -                              |
| <b>tpy1Pt</b> | 5.0   | 0.87±0.10*                          | 52.4                           |

\*  $p < 0.05$ ,  $p$  vs vehicle control.

**Table S19.** The levels of 8-OHdG in SKO3cisR cells treated with **tpy1Pt** (0.23 $\mu$ M) and **tpy2Pt** (1.97 $\mu$ M), respectively.

| groups         | control | <b>Tpy2Pt</b> | <b>tpy1Pt</b> |
|----------------|---------|---------------|---------------|
| OD values      | 0.3154  | 0.3698        | 0.4463        |
|                | 0.3342  | 0.3549        | 0.4597        |
|                | 0.3066  | 0.3863        | 0.4947        |
| 8-OHdG (ng/mL) | 8.18    | 9.92          | 12.36         |
|                | 8.78    | 9.44          | 12.79         |
|                | 7.90    | 10.45         | 13.90         |
| mean           | 8.29    | 9.94          | 13.02         |
| SD             | 0.45    | 0.50          | 0.80          |

**Table S20.** Levels of ATP in SKO3cisR cells after treated with **tpy1Pt** (0.23 $\mu$ M) and **tpy2Pt** (1.97 $\mu$ M) for 48 h (n = 3, p < 0.05).

| groups                  | control | <b>Tpy2Pt</b> | <b>tpy1Pt</b> |
|-------------------------|---------|---------------|---------------|
| OD values               | 49915   | 42896         | 18960         |
|                         | 53819   | 45556         | 17872         |
|                         | 54871   | 46709         | 19453         |
| correction of OD values | 49894   | 42875         | 18939         |
|                         | 53798   | 45535         | 17851         |
|                         | 54850   | 46688         | 19432         |
| ATP values ( $\mu$ M)   | 5.02    | 4.32          | 1.93          |
|                         | 5.41    | 4.59          | 1.82          |
|                         | 5.52    | 4.70          | 1.98          |
| Mean                    | 5.32    | 4.54          | 1.91          |
| SD                      | 0.26    | 0.20          | 0.08          |

**Table S21.** Levels of mitochondrial respiratory chain complex I in SKO3cisR cells after treated with **tpy1Pt** (0.23 $\mu$ M) and **tpy2Pt** (1.97 $\mu$ M) for 48 h (n = 3, p < 0.05).

| groups        | $\Delta A$ | Cpr   | the levels of<br>mitochondrial<br>respiratory chain<br>complex I (U/mg prot) | Mean  | SD   |
|---------------|------------|-------|------------------------------------------------------------------------------|-------|------|
| control       | 0.0979     | 1.880 | 83.74                                                                        | 82.33 | 4.31 |
|               | 0.0895     | 1.678 | 85.76                                                                        |       |      |
|               | 0.0683     | 1.417 | 77.49                                                                        |       |      |
| <b>Tpy2Pt</b> | 0.069      | 1.625 | 68.27                                                                        | 71.16 | 2.55 |
|               | 0.1068     | 2.350 | 73.09                                                                        |       |      |
|               | 0.0992     | 2.212 | 72.13                                                                        |       |      |
| <b>tpy1Pt</b> | 0.0403     | 2.322 | 27.91                                                                        | 29.96 | 2.22 |
|               | 0.028      | 1.518 | 29.66                                                                        |       |      |
|               | 0.0309     | 1.537 | 32.32                                                                        |       |      |

$\Delta A$ : Measured value for each sample; Cpr: The protein concentration of each sample; All assays and calculation process were performed according to the manufacturer's instructions (mitochondrial respiratory chain complexes I and IV, Solarbio Life Sciences, Beijing, China).

**Table S22.** Levels of mitochondrial respiratory chain complex IV in SKO3cisR cells after treated with **tpy1Pt** (0.23 $\mu$ M) and **tpy2Pt** (1.97 $\mu$ M) for 48 h (n = 3, p < 0.05).

| groups        | $\Delta A$ | Cpr   | the levels of<br>mitochondrial<br>respiratory chain<br>complex IV (U/mg prot) | Mean  | SD   |
|---------------|------------|-------|-------------------------------------------------------------------------------|-------|------|
| control       | 0.0857     | 1.338 | 70.39                                                                         | 71.48 | 2.91 |
|               | 0.0607     | 0.892 | 74.78                                                                         |       |      |
|               | 0.0863     | 1.369 | 69.27                                                                         |       |      |
| <b>Tpy2Pt</b> | 0.0899     | 1.725 | 57.28                                                                         | 60.71 | 4.14 |
|               | 0.0563     | 0.947 | 65.31                                                                         |       |      |
|               | 0.0807     | 1.489 | 59.55                                                                         |       |      |
| <b>tpy1Pt</b> | 0.0289     | 1.110 | 28.62                                                                         | 29.54 | 2.06 |
|               | 0.0253     | 0.872 | 31.90                                                                         |       |      |
|               | 0.0209     | 0.818 | 28.09                                                                         |       |      |

**Original images of western blotting experiments**

**Beclin-1**

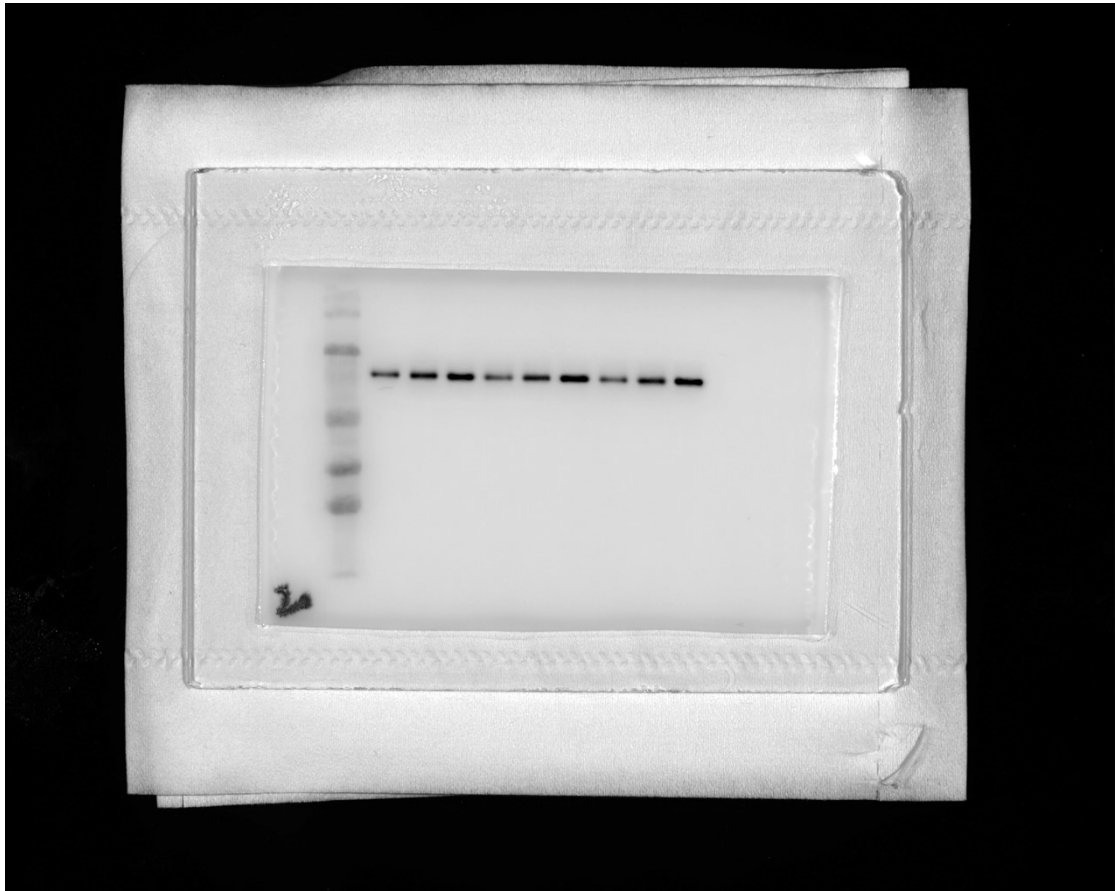

## Caspase-9

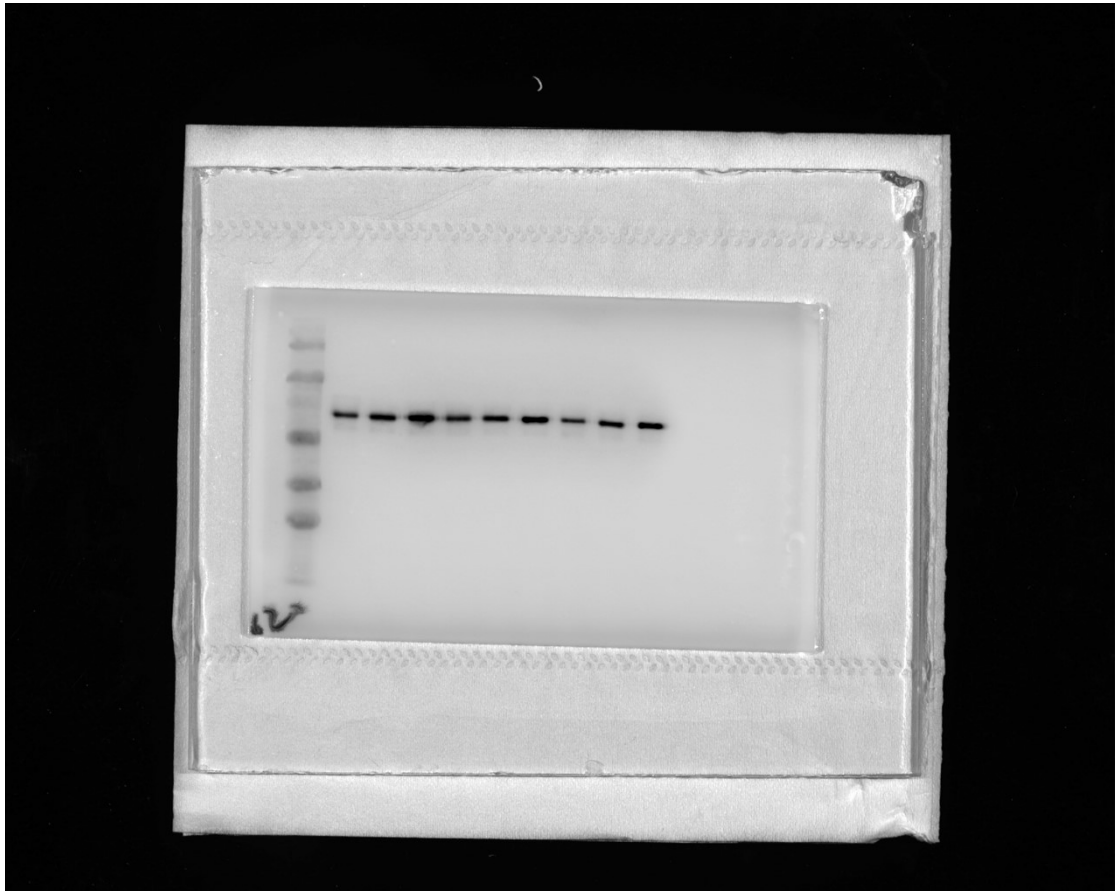



**cleaved-Caspase-3**

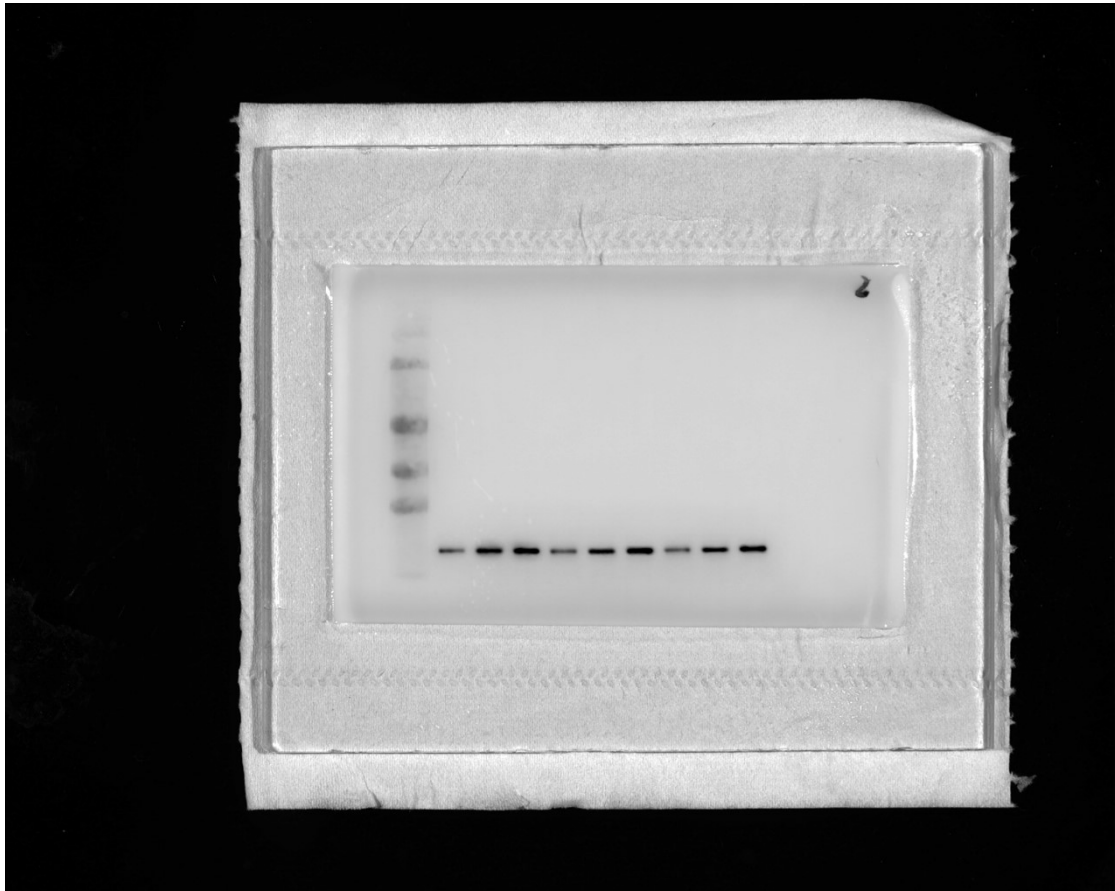

## Cytochrome c

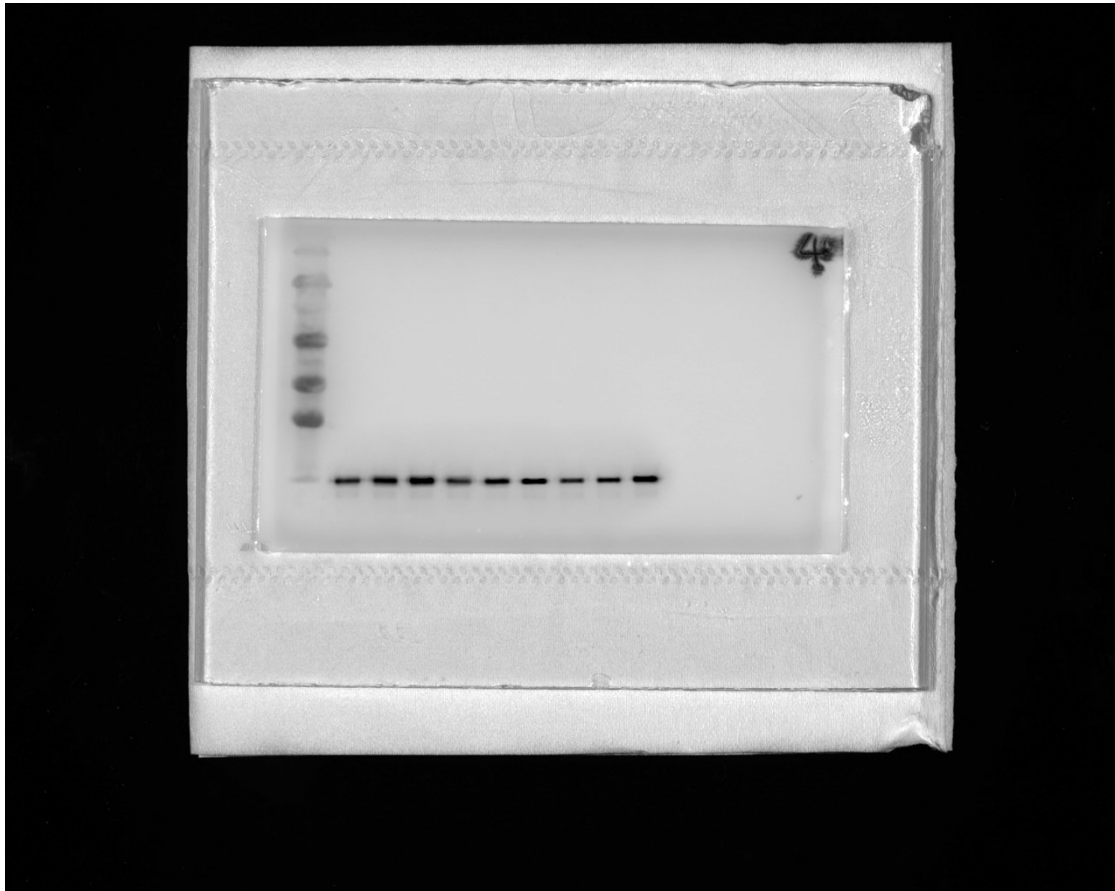

FUNDC1

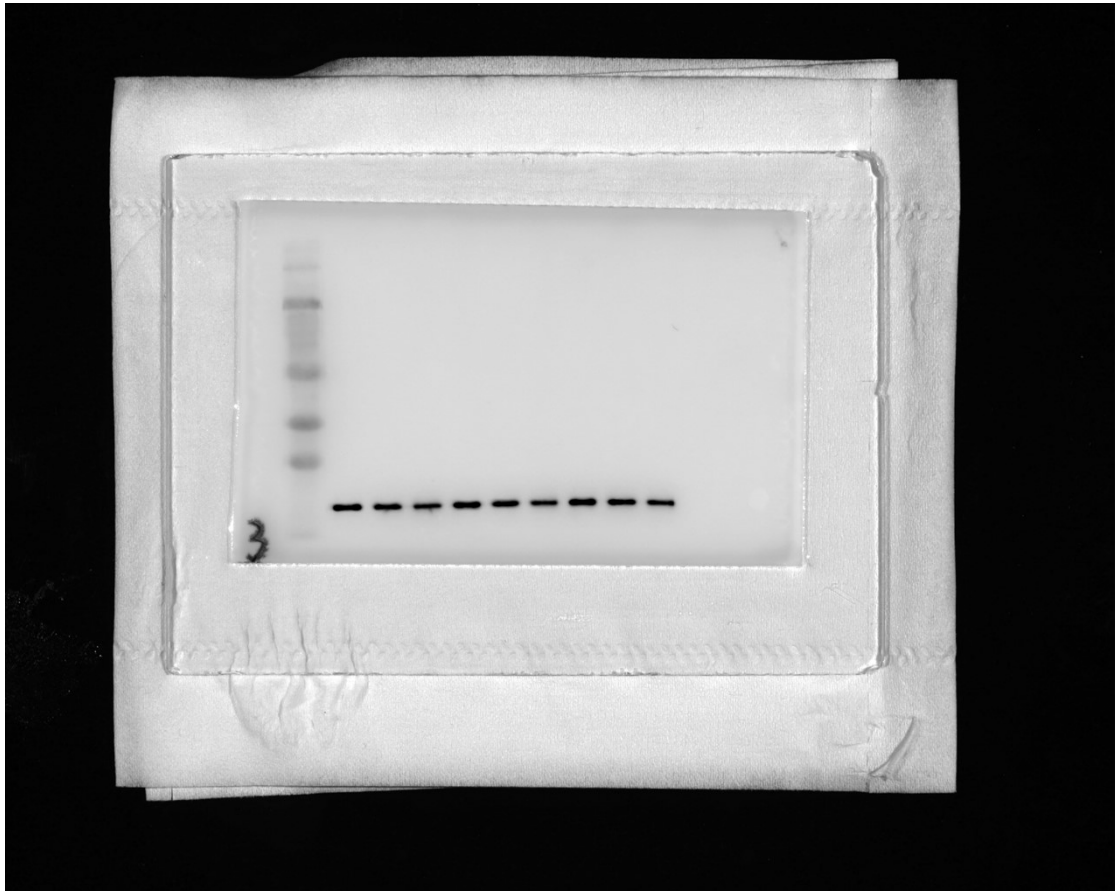

**GAPDH-1**

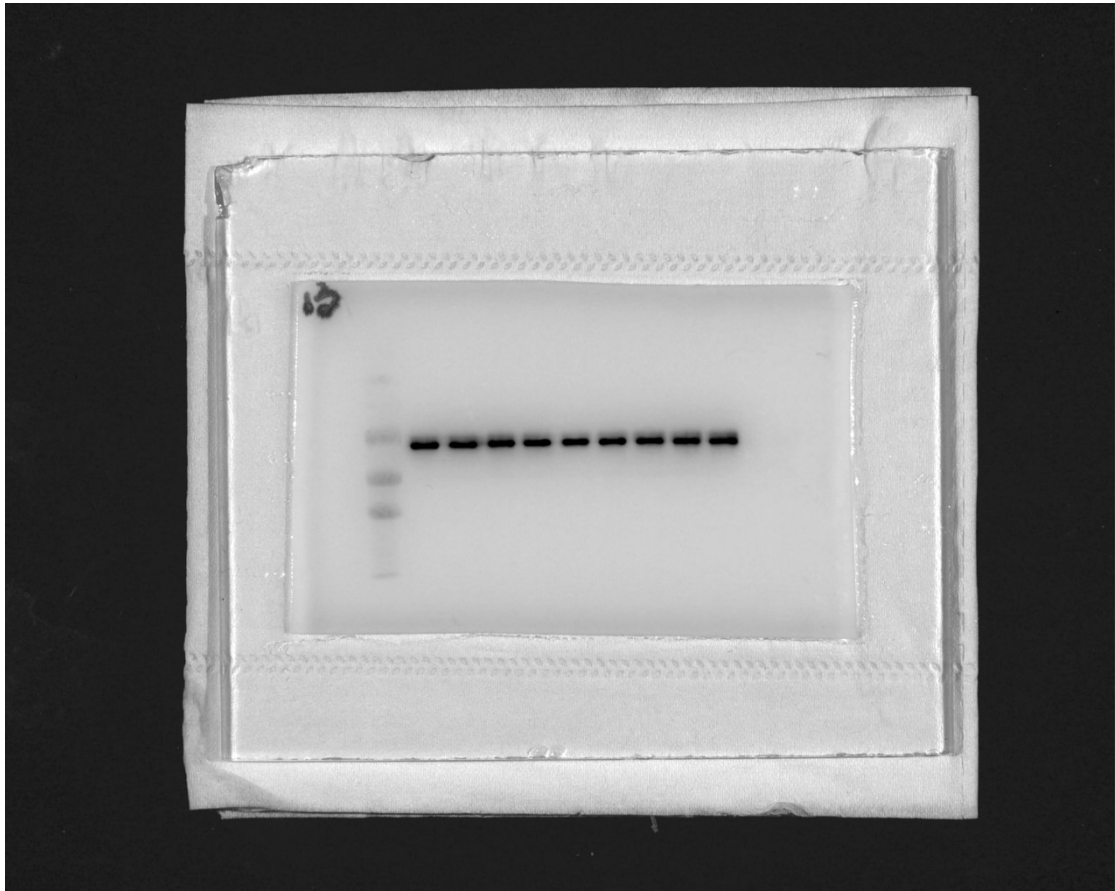

**GAPDH-2**

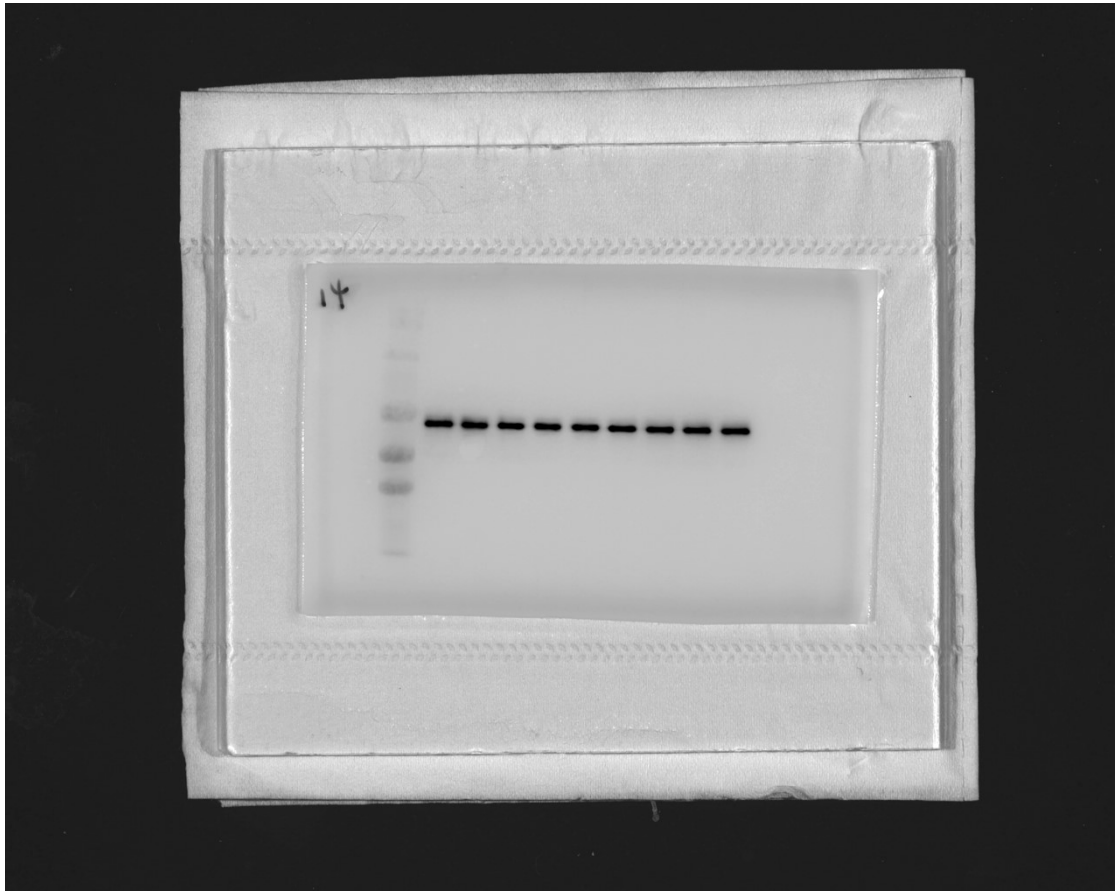

LC3

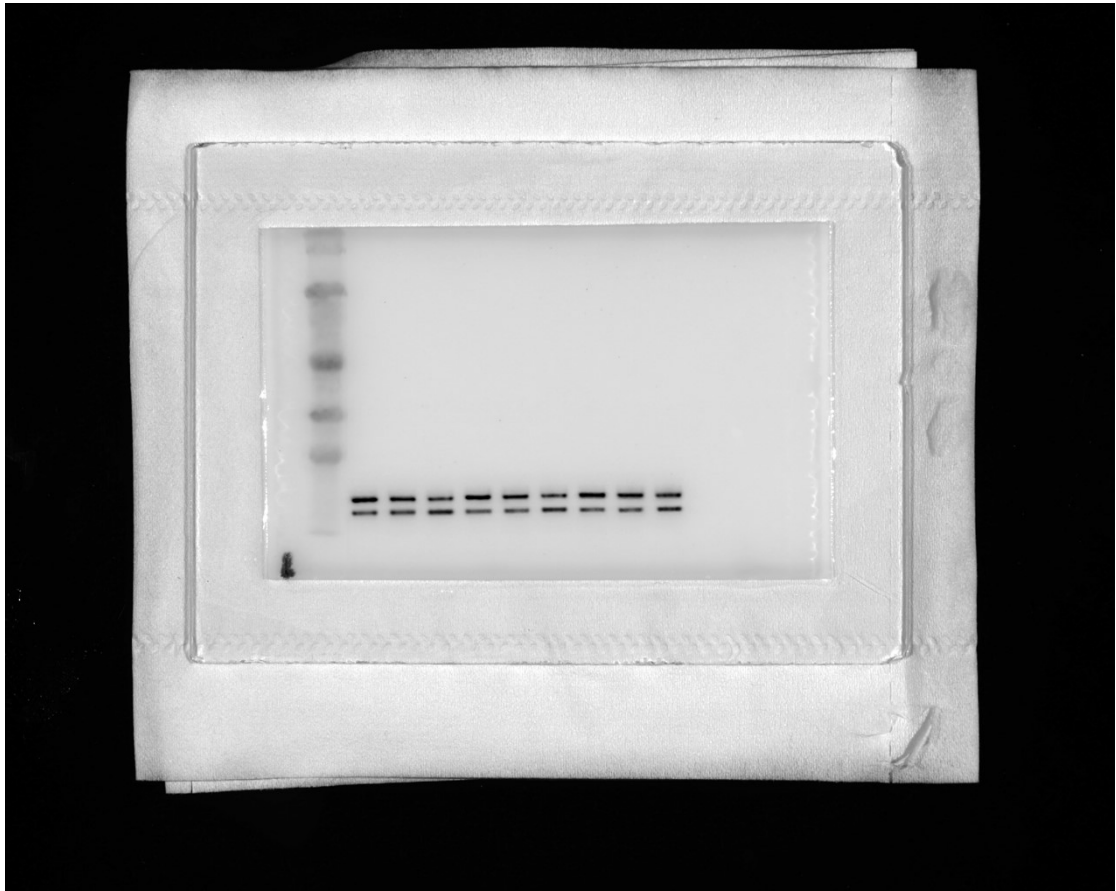

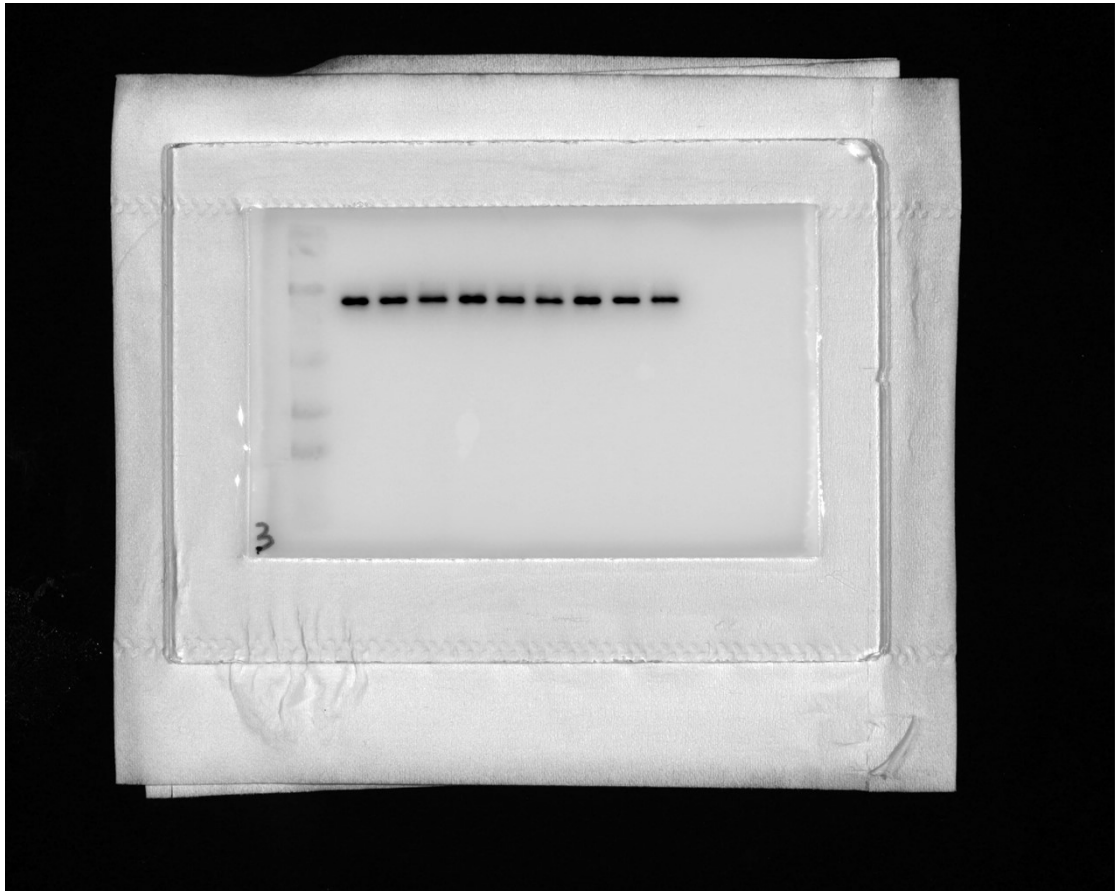

Parkin

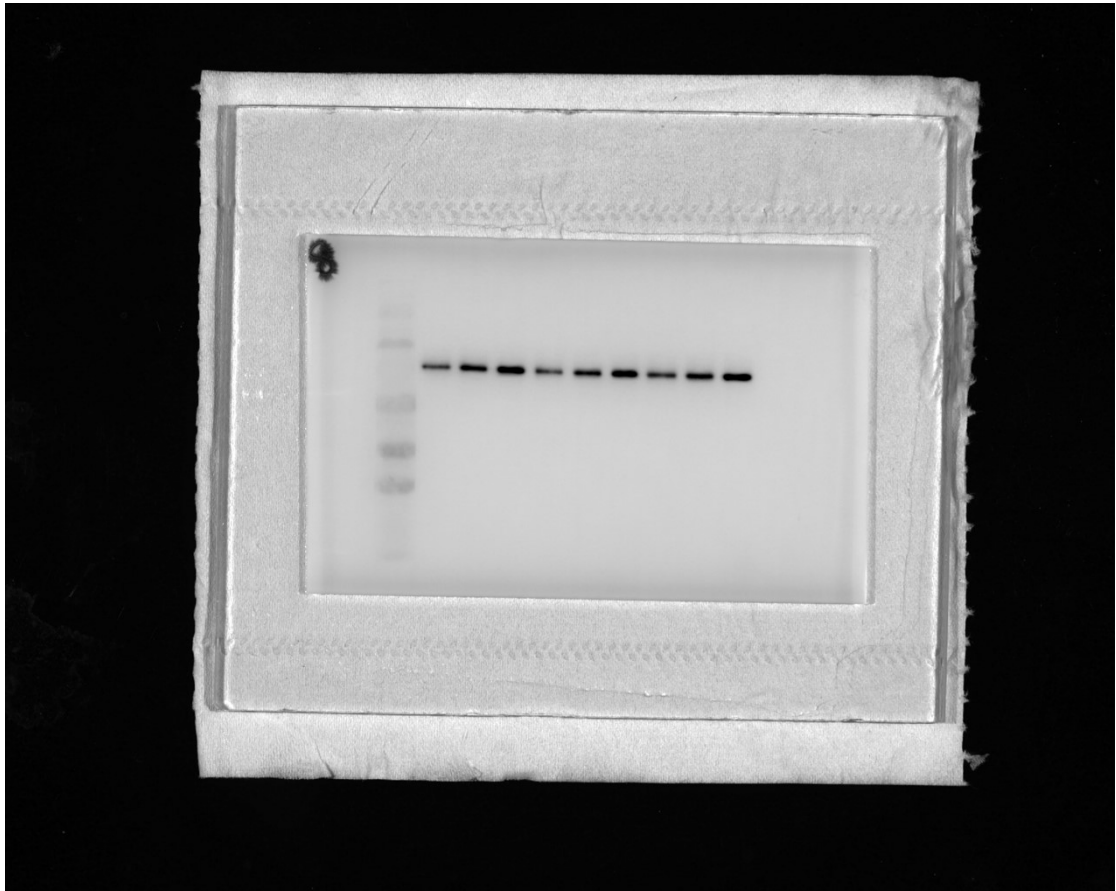



**PINK1**

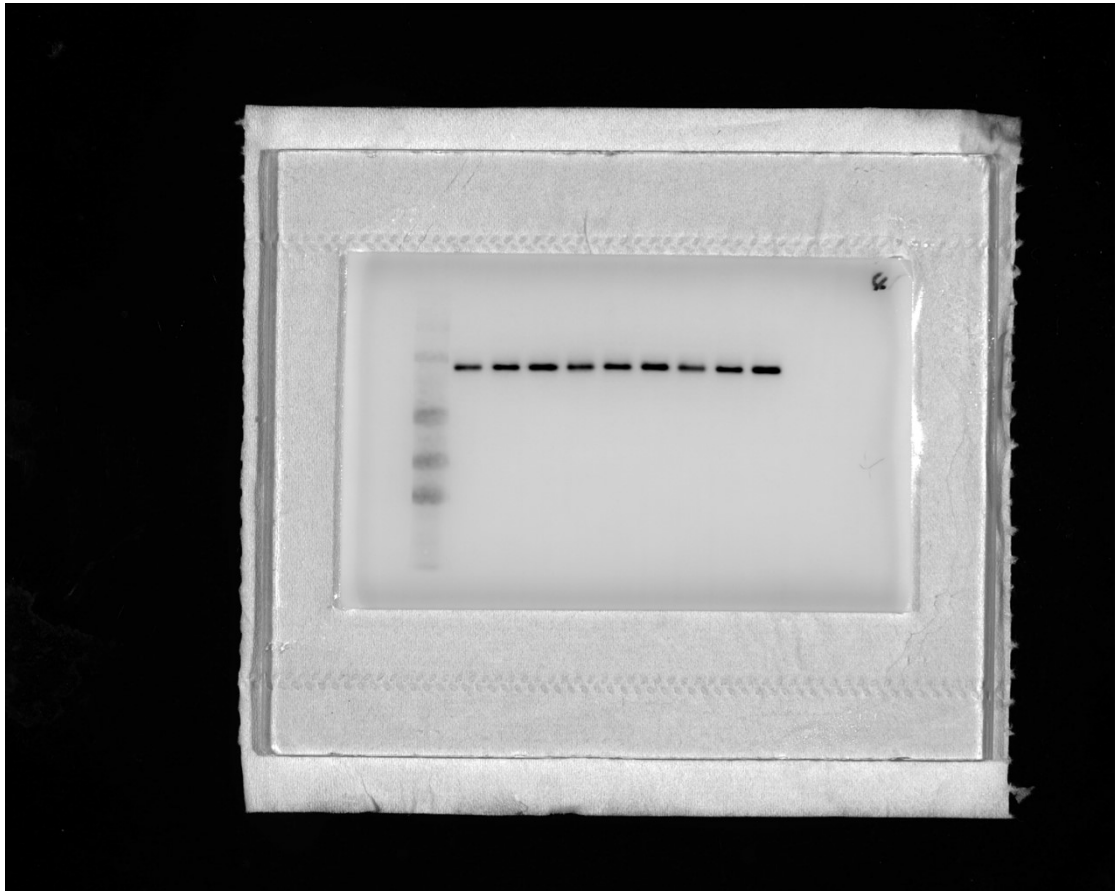

## Materials and methods

### *In vivo assays*

SKO3 cancer cells were harvested and injected subcutaneously into the right flank of nude mice with  $5 \times 10^6$  cells in 200  $\mu\text{L}$  of serum-free medium. When the xenograft tumor growth to the volume about 1.0  $\text{cm}^3$ , the mice were killed and the tumor tissue were cut into about 1.5  $\text{mm}^3$  small pieces, and then transplanted into the right flank of female nude mice, When tumors reach a volume of 0.09-0.10  $\text{cm}^3$  on all mice, the mice were randomized into vehicle control and treatment groups ( $n=6/\text{group}$ ), received the following treatments: (a) control, 5.0% v/v DMSO/saline vehicle, (b) **tpy1Pt** at dose 5.0 mg/kg every two day (5.0% v/v DMSO/saline). The tumor volumes were determined every three days by measuring length ( $l$ ) and width ( $w$ ) and calculating volume, tumor volume and inhibition of tumor growth were calculated using formulas 1–3: [1–5]

$$\text{Tumor volume: } V = (w^2 \times l) / 2 \quad (1)$$

$$\text{The tumor relative increment rate: } T/C (\%) = T_{\text{RTV}} / C_{\text{RTV}} \times 100\% \quad (2)$$

$$\text{inhibition of tumor growth: } IR(\%) = (W_c - W_t) / W_c \times 100\% \quad (3)$$

Where  $w$  and  $l$  mean the shorter and the longer diameter of the tumor respectively;  $T_{\text{RTV}}$  and  $C_{\text{RTV}}$  was the RTV of treated group and control group respectively. (RTV: relative tumor volume,  $\text{RTV} = V_t / V_0$ );  $W_t$  and  $W_c$  mean the average tumor weight of complex-treated and vehicle/controlled group respectively.

In addition, the SKO3 xenograft mouse models were purchased from Shanghai Lingchang Biotechnology Co., Ltd. (Shanghai, China, approval No. SCXK(Hu) 2018-0003). The animal procedures were approved by Nanjing Ramda Pharmaceutical Co., Ltd. (Jiangsu, China, approval No. SYXK(Su) 2022-0038). And all of the experimental procedures were carried out in accordance with the NIH Guidelines for

the Care and Use of Laboratory Animals. The animal experiments were approved by Nanjing Ramda Pharmaceutical Co., Ltd. (Jiangsu, China).

### Statistical Analysis

The experiments have been repeated from three to five times, and the results obtained are presented as means  $\pm$  standard deviation (SD). Significant changes were assessed by using Student's *t* test for unpaired data, and *p* values of  $<0.05$  were considered significant.

### Abbreviations

SD, standard deviation; TBS, Tris-HCl buffer; MTT, 3-(4,5-dimethylthiazol-2-yl)-2,5-diphenyltetrazolium bromide; TGI, tumor growth inhibition; PI, propidium iodide; MMP, mitochondrial membrane potential; JC-1, 5,5',6,6'-tetrachloro-1,1',3,3'-tetraethylbenzimidazolylcarbocyanine; IR, tumor growth inhibition rate.

### References

- [1] (a) Y. Lai, N. Lu, A. Ouyang, Q. Zhang, P. Zhang, Ferroptosis promotes sonodynamic therapy: a platinum(II)-indocyanine sonosensitizer, *Chem. Sci.* 13 (2022) 9921–9926. (b) X.-M. Liu, Z. Li, X.-R. He, R.-P. Liu, Z.-Y. Ma, X. Qiao, S.-Q. Wang, J.-Y. Xu, Dual-targeting of the aromatase binding domain of heme and androstenedione by Pt(IV) prodrugs: a new treatment for postmenopausal breast cancer, *Inorg. Chem. Front.* 9 (2022) 3470–3483. (c) Y. Li, S. Shi, S. Zhang, Z. Gan, X. Wang, X. Zhao, Y. Zhu, M. Cao, X. Wang, W. Li, etc. [Pt(NH<sub>3</sub>)<sub>2</sub>(cinnamate)(valproate)Cl<sub>2</sub>] is a highly potent and low-toxic triple action anticancer prodrug, *Dalton Trans.* 50 (2021) 11180–11188.
- [2] (a) M. Uemura, K. Hiramoto, H. Yoneyama, S. Harusawa, S. Komeda,

Introduction of Fluorine into Antitumor-Active Dinuclear Platinum(II) Complexes Leads to Modulation of In Vivo Antitumor Activity in Mice, *Inorg. Chem.* 61 (2022) 12155–12164. (b) Y.-F. Wang, J.-X. Tang, Z.-Y. Mo, J. Li, F.-P. Liang, H.-H. Zou, The strong in vitro and vivo cytotoxicity of three new cobalt(II) complexes with 8-methoxyquinoline, *Dalton Trans.* 51 (2022) 8840–8847.

[3] (a) Y.-Q. Gu, W.-Y. Shen, Q.-Y. Yang, Z.-F. Chen, H. Liang, Ru(III) complexes with pyrazolopyrimidines as anticancer agents: bioactivities and the underlying mechanisms, *Dalton Trans.* 51 (2022) 1333–1343. (b) W.-Y. Shen, C.-P. Jia, A.-N. Mo, H. Liang, Z.-F. Chen, Chemodynamic therapy agents Cu(II) complexes of quinoline derivatives induced ER stress and mitochondria-mediated apoptosis in SK-OV-3 cells, *Eur. J. Med. Chem.* 223 (2021) 113636. (c) X. Huang, S. Hua, R. Huang, Z. Liu, S. Gou, Z. Wang, Z. Liao, H. Wang, Dual-targeting antitumor hybrids derived from Pt(IV) species and millepachine analogues, *Eur. J. Med. Chem.* 148 (2018) 1–25.

[4] (a) Z. Zhou, L.-Q. Du, X.-M. Huang, L.-G. Zhu, Q.-C. Wei, Q.-P. Qin, H. Bian, Novel glycosylation zinc(II)-cryptolepine complexes perturb mitophagy pathways and trigger cancer cell apoptosis and autophagy in SK-OV-3/DDP cells, *Eur. J. Med. Chem.* 243 (2022) 114743. (b) Z.-F. Wang, X.-F. Zhou, Q.-C. Wei, Q.-P. Qin, J.-X. Li, M.-X. Tan, S.-H. Zhang, Novel bifluorescent Zn(II)-cryptolepine-cyclen complexes trigger apoptosis induced by nuclear and mitochondrial DNA damage in cisplatin-resistant lung tumor cells, *Eur. J. Med. Chem.* 238 (2022) 114418. (c) S.-H. Zhang, Z.-F. Wang, H. Tan, Novel zinc(II)-curcumin molecular probes bearing berberine and jatrorrhizine derivatives as potential mitochondria-targeting anti-neoplastic drugs, *Eur. J. Med. Chem.*

243(2022) 114736. (d) L. Li, X. Huang, R. Huang, S. Gou, Z. Wang, H. Wang, Pt(IV) prodrugs containing microtubule inhibitors displayed potent antitumor activity and ability to overcome cisplatin resistance, *Eur. J. Med. Chem.* 156 (2018) 666–679. (e) Q.-P. Qin, Z.-Z. Wei, Z.-F. Wang, X.-L. Huang, M.-X. Tan, H.-H. Zou, H. Liang, Imaging and therapeutic applications of Zn(II)-cryptolepine–curcumin molecular probes in cell apoptosis detection and photodynamic therapy, *Chem. Commun.* 56 (2020) 3999–4002.

[5] Q.-P. Qin, Z.-F. Wang, S.-L. Wang, D.-M. Luo, B.-Q. Zou, P.-F. Yao, M.-X. Tan, H. Liang, In vitro and in vivo antitumor activities of three novel binuclear platinum(II) complexes with 4'-substituted-2,2':6',2''-terpyridine ligands, *Eur. J. Med. Chem.* 170 (2019) 195–202.
